# Supplementary material
Source: Elsevier journal article supplement (https://rcastoragev2.blob.core.windows.net/7f94f7ba0852231644cce6e0c9053d04/mmc1.pdf)
Supplement: mmc1 [file mmc1.pdf]

# THE LANCET

## **Supplementary appendix**

This appendix formed part of the original submission and has been peer reviewed. We post it as supplied by the authors.

Supplement to: Nair H, Simões EAF, Rudan I, et al, for the Severe Acute Lower Respiratory Infections Working Group. Global and regional burden of hospital admissions for severe acute lower respiratory infections in young children in 2010: a systematic analysis. *Lancet* 2013; published online Jan 29. [http://dx.doi.org/10.1016/S0140-6736\(12\)61901-1](http://dx.doi.org/10.1016/S0140-6736(12)61901-1).

# Appendix for “Global and regional burden of hospital admissions for severe acute lower respiratory infections in young children in 2010: a systematic analysis”

---

## Contents

|      |                                                                                                                                                    |    |
|------|----------------------------------------------------------------------------------------------------------------------------------------------------|----|
| I.   | Search Strategy in Databases.....                                                                                                                  | 4  |
| II.  | Data imputation to deal with missing data.....                                                                                                     | 7  |
|      | Developing countries .....                                                                                                                         | 7  |
|      | Industrialised countries.....                                                                                                                      | 7  |
|      | Sensitivity analysis .....                                                                                                                         | 7  |
| III. | Adjustment of incidence rates for study from South Africa by Madhi et al., 2005 based on HIV prevalence and access to antiretroviral therapy ..... | 9  |
|      | Adjustment for IR of severe ALRI in children 0-4 years in placebo group .....                                                                      | 9  |
|      | Adjustment for IR of very severe ALRI in children 0-4 years in placebo group .....                                                                 | 10 |
| IV.  | Estimated total episodes of severe ALRI.....                                                                                                       | 12 |
|      | Approach 1.....                                                                                                                                    | 12 |
|      | Approach 2.....                                                                                                                                    | 12 |
| V.   | Additional Tables .....                                                                                                                            | 13 |
| VI.  | Additional Figures .....                                                                                                                           | 37 |
|      | References .....                                                                                                                                   | 47 |

## List of tables

|                                                                                                                                                                                                 |    |
|-------------------------------------------------------------------------------------------------------------------------------------------------------------------------------------------------|----|
| Table A1: Comparison of incidence estimates for the different severity categories of hospitalised ALRI in the year 2008 after excluding imputed data .....                                      | 8  |
| Table A2: Details of unpublished studies included in the meta-analysis.....                                                                                                                     | 14 |
| Table A3: Incidence estimates of hospitalised severe ALRI in children younger than 5 years from published and unpublished studies by World Health Organization regions .....                    | 17 |
| Table A4: Incidence of hospitalised very severe ALRI in children younger than 5 years from published and unpublished studies by World Health Organization regions .....                         | 27 |
| Table A5: Incidence of hospitalised severe and very severe ALRI in neonates (aged 0-27 days) from published and unpublished studies by World Health Organization regions .....                  | 31 |
| Table A6: Comparative Incidence of severe and very severe ALRI from studies reporting data using community-based active case ascertainment as well as hospital-based passive case ascertainment | 33 |
| Table A7: Details of the 37 studies reporting in-hospital case fatality ratios in children (0-59 months) hospitalised for severe ALRI.....                                                      | 34 |
| Table A8: Details of the 16 studies reporting in-hospital case fatality ratios in children (0-59 months) hospitalised for very severe ALRI.....                                                 | 36 |

## List of figures

|                                                                                                                                                          |    |
|----------------------------------------------------------------------------------------------------------------------------------------------------------|----|
| Figure A1: Incidence of hospitalised severe ALRI (per 1000 children per year) in children aged 0-4 years with / without lower chest wall indrawing ..... | 38 |
| Figure A2: Incidence of hospitalised severe ALRI (per 1000 children per year) in children aged 0-4 years with lower chest wall indrawing .....           | 39 |
| Figure A3: Incidence of hospitalised severe ALRI in children aged 0-27 days .....                                                                        | 40 |
| Figure A4: Incidence of hospitalised very severe ALRI in children aged 0-27 days .....                                                                   | 41 |
| Figure A5: Prevalence of hypoxemia in children aged 0-11 months hospitalised for severe ALRI (n=22 studies).....                                         | 42 |
| Figure A6: Prevalence of hypoxemia in children aged 12-59 months hospitalised for severe ALRI (n=21 studies) .....                                       | 43 |
| Figure A7: Relationship between incidence of hospitalised severe ALRI and in-hospital CFR in Africa .....                                                | 44 |
| Figure A8: Relationship between incidence of hospitalised severe ALRI and in-hospital CFR in Americas.....                                               | 44 |
| Figure A9: Relationship between incidence of hospitalised severe ALRI and in-hospital CFR in South-East Asia .....                                       | 45 |
| Figure A10: Relationship between incidence of hospitalised severe ALRI and in-hospital CFR in Western Pacific Region .....                               | 45 |
| Figure A11: Variation in incidence (per 1000 children per year) of hospitalised severe ALRI by distance from hospital .....                              | 46 |

# I. Search Strategy in Databases

## MEDLINE

1. exp Pneumonia/
2. exp Respiratory Tract Infections/ or acute lower respiratory infections.mp.
3. acute respiratory infection\$.mp.
4. lower respiratory infection\$.mp.
5. exp Bronchiolitis/ or Bronchiolitis, Viral/
6. Pneumococcal Vaccines/ or Haemophilus Vaccines/
7. \*Zinc/
8. Vitamin A/
9. exp Incidence/
10. disease burden.mp.
11. exp Morbidity/
12. 1 or 2 or 3 or 4 or 5
13. 6 or 7 or 8
14. 1 and 13
15. 9 or 10 or 11
16. 12 or 14
17. 15 and 16
18. limit 17 to (yr="1990 -Current" and ("all infant (birth to 23 months)" or "preschool child (2 to 5 years)") and humans)

## EMBASE

1. exp respiratory tract infection/ or exp lower respiratory tract infection/ or acute lower respiratory tract infection\$.mp. or exp pneumonia/
2. lower respiratory infection\$.mp.
3. acute lower respiratory infection\$.mp.
4. exp BRONCHIOLITIS/ or VIRAL BRONCHIOLITIS/
5. exp Pneumococcus vaccine/
6. exp Haemophilus influenzae type b vaccine/
7. \*ZINC/
8. \*alpha tocopherol/ or Vitamin A.mp.
9. exp INCIDENCE/
10. disease burden.mp.
11. exp MORBIDITY/

12. 1 or 2 or 3 or 4
13. 5 or 6 or 7 or 8
14. 1 and 13
15. 9 or 10 or 11
16. 12 or 14
17. 15 and 16
18. limit 17 to (human and yr="1990 -Current" and (infant or preschool child <1 to 6 years>))

## **GLOBAL HEALTH**

1. (pneumonia or lower respiratory tract infections).sh.
2. acute respiratory infection\$.mp.
3. exp bronchiolitis/
4. vaccines.sh.
5. (retinol or zinc).sh.
6. exp incidence/
7. disease burden.mp. or morbidity.sh.
8. exp children/
9. 1 or 2 or 3
10. 4 or 5
11. 9 and 10
12. 6 or 7
13. 9 or 11
14. 12 and 13
15. 8 and 14
16. limit 15 to yr="1990 -Current"

## **CINAHL**

TI Pneumonia

OR

TI Community Acquired Pneumonia

OR

TI Pneumonia Virus\$

OR

TI Pneumonia bacteria\$

OR

TI bronchiolitis

OR

TI Acute Lower Respiratory Infection.

AND

TI Children

Limiters: 1990-2012; infants: 1 to 23 months & Child, Preschool 2-5 years

## **WHO LIS**

Title "Pneumonia" OR title "Community acquired pneumonia" OR title "bacterial pneumonia" OR title "viral pneumonia" OR title "acute lower respiratory infection" AND title "children"

## **LILACS**

Pneumonia [Title words] or Community Acquired Pneumonia [Title words] and Children [Title words]

## **IndMED**

(Pneumonia) OR (Community acquired pneumonia) AND (Children)

Web of Knowledge

Title=(Pneumonia) OR Title=(acute lower respiratory infection\*) AND Title=(child\*)

Timespan=1990-2012

## **SIGLE**

Pneumonia AND Child\*

## II. Data imputation to deal with missing data

Only 43 of the 89 studies included in this review provided data for the full age range (0-4 years). In order to deal with the missing data, we performed data imputation separately for the developing and industrialised regions for both hospitalised severe ALRI and very severe ALRI as described below. We have assumed that the age structure is similar across all studies from a given region (i.e. developed or industrialised countries).

### Developing countries

For **severe ALRI** data on full age range were available from 17 published studies<sup>1-17</sup> and 18 unpublished studies<sup>U1, U3, U5-8, U10, U12, U14, U17-20, U22, U23, and U25-27</sup> (for details see pp 14-16 of this webappendix). Using incidence rate data from these studies, we calculated the median incidence rate ratio (IRR) for children in the age group 0-<2 years and 0-<5 years. Relative to an incidence of 1.0 in the age group 0-<1 years, the median IRR for the age group 0-<2 years and 0-<5 years was calculated to be 0.75 and 0.37. This median IRR was then applied to the reported incidence rates of severe ALRI for 0-<1 or 0-<2 or 0-<5 years to estimate the incidence rate for the missing age groups.

Five published studies<sup>5, 7, 14, 16, 17</sup> and 16 unpublished studies<sup>U3, U5-7, U9, U10, U12, U14, U18-20, U22, U23, U25, U26, and U29</sup> (for details see pp 14-16 of this webappendix) reported incidence data for **very severe ALRI** for the full age range. Using incidence rate data from these studies, we calculated the median IRR for children in the age group 0-<2 years and 0-<5 years. Relative to an incidence of 1.0 in the age group 0-<1 years, the median IRR for the age group 0-<2 years and 0-<5 years was calculated to be 0.64 and 0.36. We then applied this median IRR to the reported incidence rates influenza episodes for 0-<1 or 0-<2 or 0-<5 years to estimate the incidence rate for the missing age groups.

### Industrialised countries

For **severe ALRI** data on full age range were available from 7 published studies<sup>18-24</sup> and one unpublished study<sup>U9</sup>. Using incidence rate data from these studies, we calculated the median incidence rate ratio (IRR) for children in the age group 0-<2 years and 0-<5 years. Relative to an incidence of 1.0 in the age group 0-<1 years, the median IRR for the age group 0-<2 years and 0-<5 years was calculated to be 0.70 and 0.45.

### Sensitivity analysis

In order to assess the validity of data after imputation, we carried out a sensitivity analysis by including studies which had data for the full age range. We found no difference in the overall rates for hospitalised severe ALRI and very severe ALRI in children aged 0-59 months (Table A1). In general, where there was a difference, the incidence rates were lower after including imputed data (i.e. our estimates are more conservative). This supports our decision and validates our method to impute missing data.

**Table A1: Comparison of incidence estimates for the different severity categories of hospitalised ALRI in the year 2008 after excluding imputed data**

|                         | Region                | 0-11 months                                                                       |                                                                                   | 0-59 months                                                                       |                                                                                   |
|-------------------------|-----------------------|-----------------------------------------------------------------------------------|-----------------------------------------------------------------------------------|-----------------------------------------------------------------------------------|-----------------------------------------------------------------------------------|
|                         |                       | Incidence meta-estimate including imputed data (episodes /1000 children per year) | Incidence meta-estimate excluding imputed data (episodes /1000 children per year) | Incidence meta-estimate including imputed data (episodes /1000 children per year) | Incidence meta-estimate excluding imputed data (episodes /1000 children per year) |
| <b>Severe ALRI</b>      | <b>Developing</b>     | 51.8 (44.8 to 59.8) *                                                             | 57.7 (50.9 to 65.3)                                                               | 19.7 (17.1 to 22.7)                                                               | 19.7 (16.8 to 23.1)                                                               |
|                         | <b>Industrialised</b> | 19.6 (16.1 to 23.9)                                                               | 23.7 (18.2 to 31.1)                                                               | 9.9 (7.4 to 13.3)                                                                 | 8.7 (6.4 to 11.8)                                                                 |
| <b>Very severe ALRI</b> | <b>Developing</b>     | 13.7 (10.2 to 18.5)                                                               | 14 (10.4 to 18.9)                                                                 | 5.1 (3.8 to 6.9)                                                                  | 5.3 (3.9 to 7.3)                                                                  |
|                         | <b>Industrialised</b> | 8.6 (8.4 to 8.9)                                                                  | 8.6 (8.4 to 8.9)                                                                  | 3 (2.9 to 3.1)                                                                    | 3 (2.9 to 3.1)                                                                    |

\* Data in parentheses indicate 95% CI

### III. Adjustment of incidence rates for study from South Africa by Madhi et al., 2005 based on HIV prevalence and access to antiretroviral therapy

#### Adjustment for IR of severe ALRI in children 0-4 years in placebo group

Reported IR of severe ALRI in all children (HIV pos and neg) in 2002,  $I_{sev(2002)} = 3565$  per 100,000

Prevalence of HIV in 2002,  $Prev_{2002} = 5.5\%$

IR of severe ALRI in HIV neg ( $I_{nsev}$ ) = 2566 per 100,000

IR of severe ALRI in HIV pos ( $I_{psev}$ ) = 16724 per 100,000

$$I_{sev(2002)} = I_{psev} + I_{nsev} \text{ -----(1)}$$

Prevalence of HIV in <5 children ( $p_1$ ) in 2008,  $p_1 = 3.5\%$

Thus, IR of overall severe ALRI adjusting for HIV prevalence in 2008,  $I_{punadjsev(2008)}$

$$= [I_{psev} \times p_1] + [I_{nsev} \times (1-p_1)]$$

$$= I_{punadjsev(2008)} + I_{nsev(2008)}$$

$$= [16724 \times 0.035] + [2566 \times 0.965]$$

$$= 585.34 + 2476.19$$

$$= 3061.53$$

Now  $I_{punadjsev(2008)}$  is a combination of IR in those who receive HRT and those who don't

Proportion of access to ART in 2002,  $P_{art(2002)} = 9\%$

Let us assume that risk of severe ALRI in those who receive ART = same as in HIV negative

Risk of severe ALRI in HIV positive (with ART) =  $X_1$

Risk of severe ALRI in HIV positive (without ART) =  $X_2$

Incidence of severe ALRI in HIV positive,  $I_{punadjsev(2008)}$

$$= 585.34 = (9 \times X_1) + (91 \times X_2) \text{ -----(2)}$$

The risk of severe ALRI in HIV positive compared to HIV negative in placebo group =  $I_{psev}/I_{nsev} = 6.5$

Thus,  $X_2/X_1 = 6.5$

Substituting these in equation (2)

$$I_{punadjsev(2008)} = 585.34 = 9X_1 + 591.5X_1$$

$$= 600.5X_1$$

Thus,  $X_1 = 0.97$

And  $X_2 = 6.31$

Prevalence of ART in 2008 = 75%

Substituting these values in equation (2)

$$\begin{aligned} I_{\text{adjsev}(2008)} &= 75 \times 0.97 + 25 \times 6.31 \\ &= 72.75 + 157.75 \\ &= 230.5 \text{ -----(3)} \end{aligned}$$

Substituting this value in equation (1)

$$\begin{aligned} I_{\text{sev}(2008)} &= I_{\text{adjsev}(2008)} + I_{\text{nsev}(2008)} \\ &= 2476.19 + 230.5 \\ &= 2706.7 \end{aligned}$$

Incidence of severe ALRI in 2008 after adjusting for HIV prevalence and ART access = 2706.7 per 100,000 person years

### Adjustment for IR of very severe ALRI in children 0-4 years in placebo group

Reported IR of very severe ALRI in all children (HIV pos and neg) in 2002,  $I_{\text{vsev}(2002)} = 2259$  per 100,000

Prevalence of HIV in 2002,  $\text{Prev}_{2002} = 5.5\%$

IR of very severe ALRI in HIV neg ( $I_{\text{nvsev}}$ ) = 1530 per 100,000

IR of very severe ALRI in HIV pos ( $I_{\text{pvsev}}$ ) = 12082 per 100,000

$$I_{\text{vsev}(2002)} = I_{\text{pvsev}} + I_{\text{nvsev}} \text{ -----(7)}$$

Prevalence of HIV in <5 children ( $p_1$ ) in 2008,  $p_1 = 3.5\%$

Thus, IR of overall very severe ALRI adjusting for HIV prevalence in 2008,  $I_{\text{unadjvsev}(2008)}$

$$\begin{aligned} &= [I_{\text{pvsev}} \times p_1] + [I_{\text{nvsev}} \times (1 - p_1)] \\ &= I_{\text{unadjvsev}(2008)} + I_{\text{nvsev}(2008)} \\ &= [12082 \times 0.035] + [1530 \times 0.965] \\ &= 422.87 + 1476.45 \\ &= 1899.32 \end{aligned}$$

Now  $I_{\text{punadjvsev}}(2008)$  is a combination of IR in those who receive HRT and those who don't

Proportion of access to ART in 2002,  $P_{\text{art}(2002)} = 9\%$

Let us assume that risk of very severe ALRI in those who receive ART= same as in HIV negative

Risk of very severe ALRI in HIV positive (with ART) =  $X_1$

Risk of very severe ALRI in HIV positive (without ART) =  $X_2$

Incidence of very severe ALRI in HIV positive,  $I_{\text{punadjvsev}}(2008)$

$$= 422.87 = (9 \cdot X_1) + (91 \cdot X_2) \text{ ----- (8)}$$

The risk of very severe ALRI in HIV positive compared to HIV negative in placebo group =  $I_{\text{pvsev}}/I_{\text{nvsev}} = 7.9$

Thus,  $X_2/X_1 = 7.9$

Substituting these in equation (8)

$$\begin{aligned} I_{\text{punadjvsev}}(2008) = 422.87 &= 9X_1 + 718.9X_1 \\ &= 727.9X_1 \end{aligned}$$

Thus,  $X_1 = 0.58$

And  $X_2 = 4.59$

Prevalence of ART in 2008 = 75%

Substituting these values in equation ( )

$$\begin{aligned} I_{\text{padjvsev}}(2008) &= 75 \cdot 0.58 + 25 \cdot 4.59 \\ &= 43.5 + 114.75 \\ &= 158.25 \text{ ----- (9)} \end{aligned}$$

Substituting this value in equation (7)

$$\begin{aligned} I_{\text{vsev}}(2008) &= I_{\text{padjvsev}}(2008) + I_{\text{nvsev}}(2008) \\ &= 1476.45 + 158.25 \\ &= 1634.7 \end{aligned}$$

Incidence of very severe ALRI in 2008 after adjusting for HIV prevalence and ART access = 1634.7 per 100,000 person years

## IV. Estimated total episodes of severe ALRI

### Approach 1

Estimated number of episodes hospitalised severe ALRI in developing countries= 11.37 (95% CI- 9.87 to 13.10) million - (a)

Proportion of children with suspected “pneumonia”<sup>†</sup> in developing countries taken to a health facility (data from DHS / MICS) - 61 (95% CI- 57 to 65) percent - (b)

Estimated number of total episodes of severe ALRI in developing countries (adjusted for healthcare utilisation) – (c) = (a) x (b)

$$= 18.6 \text{ (95\% CI -15.18 to 22.98) million}$$

Estimated number of episodes of severe ALRI in industrialised countries= 0.57 (95% CI- 0.43 to 0.76) million – (d)

Estimated number of total episodes of severe ALRI globally= (e) = (c) + (d)

$$= 19.21 \text{ (95\% CI- 15.61 to 23.75) million}$$

### Approach 2

Estimated number of episodes hospitalised severe ALRI in developing countries= 11.37 (95% CI- 9.87 to 13.10) million - (a)

Estimated proportion of severe ALRI cases hospitalised following referral from community (health workers) using WHO IMCI case definitions – based on data from studies in Table A6 – 0.49 (IQR 0.36, 0.62) – (f)

Estimated number of total episodes of severe ALRI in developing countries (adjusted for care seeking) – (g) = (a) / (f)

$$= 23.20 \text{ (uncertainty range 20.14 to 26.73)}$$

Estimated number of total episodes of severe ALRI globally= (h) = (g) + (d)

$$= 23.77 \text{ (20.5 to 27.49)}$$

Estimates (e) and (h) are broadly consistent with each other. However, since the data on healthcare utilisation are based on data from 81 developing countries and the proportion of severe ALRI cases hospitalised are based on data from only 4 studies- we decided to adopt the more conservative and data-driven approach.

---

<sup>†</sup> The definition used by DHS / MICS was a mother’s perception of a child who has cough, is breathing faster than usual with short, quick breaths or is having difficulty breathing, excluding children that had only a blocked nose.

## **V. Additional Tables**

**Table A2: Details of unpublished studies included in the meta-analysis**

| S. No      | Location (reference)                                                               | Published reference                                                                                              | Remarks                                        |
|------------|------------------------------------------------------------------------------------|------------------------------------------------------------------------------------------------------------------|------------------------------------------------|
| <b>U1</b>  | Kassena-Nankana District, Ghana (Morris and colleagues)                            | VAST study Group Lancet 1993; 342(8862):7-12                                                                     | Data re-analysed using common case definitions |
| <b>U2</b>  | Upper River Division and Central River Division, The Gambia (Zaman and colleagues) | Cutts et al., Lancet 2005; 365: 1139–46                                                                          | Data re-analysed using common case definitions |
| <b>U3</b>  | Kilifi District, Kenya (Moïsi and colleagues)                                      | Moïsi et al., Bull World Health Organ. 2011 Feb 1;89(2):102-11                                                   | Data re-analysed using common case definitions |
| <b>U4</b>  | Manhiça district, Mozambique (Roca and colleagues)                                 | (1) Roca et al., Vaccine. 2010 Jul 5;28(30):4851-7<br>(2) Sigauque et al., J Trop Pediatr. 2009 Dec;55(6):379-87 | Data re-analysed using common case definitions |
| <b>U5</b>  | Bondo district, Nyanza province, Kenya (Ope and colleagues)                        | Feikin et al., Bull World Health Organ. 2012 Apr 1;90(4):256-263A                                                | Data re-analysed using common case definitions |
| <b>U6</b>  | Upper River Region, The Gambia (Mackenzie and colleagues)                          |                                                                                                                  | Data are not yet published                     |
| <b>U7</b>  | Lwak, Kisumu, Kenya (Breiman and colleagues)                                       | Feikin et al., PLoS One 2011; 6:e16085<br>Katz MA et al., J Infect Dis 2012 (In press)                           | Data re-analysed using common case definitions |
| <b>U8</b>  | Soweto, South Africa (Cohen and colleagues)                                        | Pretorius et al. ., J Infect Dis 2012 (In press)                                                                 | Data re-analysed using common case definitions |
| <b>U9</b>  | Colorado, USA (Simoes and colleagues)                                              |                                                                                                                  | Data are not yet published                     |
| <b>U10</b> | Paysandú and Salto, Uruguay (Hortal and colleagues)                                | Hortal et al., Int J Infect Dis 2007; 11:273-277                                                                 | Data re-analysed using common case definitions |
| <b>U11</b> | Yukon Kuskokwim Delta, Alaska, USA (Singleton and colleagues)                      | (1) Singleton et al, Pediatr Infect Dis J 2006;25:1116-25<br>(2) Singleton et al. J Med Virol 2010;82:1282-90    | Data re-analysed using common case definitions |
| <b>U12</b> | Concordia and Parana, Argentina (Ruvinsky and colleagues)                          | Ruvinsky RO et al., J Ped Infect Dis 2010; 5: 263-69                                                             | Data re-analysed using common case definitions |
| <b>U13</b> | San Lorenzo & Comitancillo, Guatemala (Bruce and colleagues)                       | Smith et al., Lancet 2011; 378: 1717–26                                                                          | Data re-analysed using common case definitions |
| <b>U14</b> | Pilar, (Buenos Aires Province), Argentina (Gentile and colleagues)                 |                                                                                                                  | Data are not yet published                     |
| <b>U15</b> | San José, Costa Rica (Arguedas and colleagues)                                     | Arguedas et al., Vaccine 30 (2012) 2342– 2348                                                                    | Data re-analysed using common case             |

| S. No      | Location (reference)                                                   | Published reference                                                                                                                                                      | Remarks                                               |
|------------|------------------------------------------------------------------------|--------------------------------------------------------------------------------------------------------------------------------------------------------------------------|-------------------------------------------------------|
|            |                                                                        |                                                                                                                                                                          | definitions                                           |
| <b>U16</b> | Goiânia, Brazil (Andrade and colleagues)                               | (1) Andrade et al, Vaccine 2012; 1901-09<br>(2) Thörn L.K. et al., BMC Infect Dis, 2011, 11:180<br>(3) Andrade A.L. et al., J Infect, 2010, 61(4):314-322                | Data re-analysed using common case definitions        |
| <b>U17</b> | Multicentre, El Salvador (Clara and colleagues)                        | Clara et al., Bull World Health Organ 2012;90:756–763                                                                                                                    | Data re-analysed using common case definitions        |
| <b>U18</b> | Santa Rosa, Guatemala (McCracken and colleagues)                       | Nair et al. Lancet. 2011 Dec 3;378(9807):1917-30                                                                                                                         | Data re-analysed using common case definitions        |
| <b>U19</b> | Paysandú and Salto, Uruguay (Hortal and colleagues)                    | Hortal et al., Vaccine. 2012; 30:4934                                                                                                                                    | Data re-analysed using common case definitions        |
| <b>U20</b> | Quetzaltenango, Guatemala (McCracken and colleagues)                   | Nair et al. Lancet. 2011 Dec 3;378(9807):1917-30                                                                                                                         | Data re-analysed using common case definitions        |
| <b>U21</b> | Lombok, Indonesia (Gessner and colleagues)                             | Gessner et al., Lancet 2005; 365(9543):43-52                                                                                                                             | Data re-analysed using common case definitions        |
| <b>U22</b> | Nakhon Phanom and Sa Kaeo provinces, Thailand (Baggett and colleagues) | (1) Olsen et al. Int J Infect Dis. 2006;10(6):439-45<br>(2) Olsen et al. Epidemiol Infect. 2010; Mar 31:1-12<br>(3) Baggett et al. Clin Inf Dis 2009; 48 (Suppl 2): S65. | Data re-analysed using common case definitions        |
| <b>U23</b> | Mirzapur, Bangladesh (Arifeen and colleagues)                          | Arifeen SE. et al., Clin Infect Dis. 2009 Mar 1;48 Suppl 2:S103-13.                                                                                                      | Data re-analysed using common case definitions        |
| <b>U24</b> | Multicentre, India (Chandran and colleagues)                           | Gupta et al., Indian J Med Res, May 2010; 131: 649-658                                                                                                                   | Data re-analysed using common case definitions        |
| <b>U25</b> | Kamalapur, Bangladesh (Brooks and colleagues)                          | (1) Brooks et al., Am. J. Trop. Med. Hyg. 2007; 77(5): 795-801<br>(2) Brooks et al., Pediatr Inf Dis J. 2010; 29(3): 216-21                                              | Recent data re-analysed using common case definitions |
| <b>U26</b> | Multicentre, Bangladesh (Azziz-Baumgartner and colleagues)             | Azziz-Baumgartner et al., Bull World Health Organ. 2012 January 1; 90(1): 12–19.                                                                                         | Data re-analysed using common case definitions        |
| <b>U27</b> | Ballabgarh, Haryana, India (Krishnan and colleagues)                   | Dawood et al., Lancet Infect Dis 2012; 12(9):687-695                                                                                                                     | Data are not yet published                            |
| <b>U28</b> | Bohol, Philippines (Lucero and colleagues)                             | Lucero et al. Pediatr Infect Dis J 2009; 28: 455–462.                                                                                                                    | Data re-analysed using common case                    |

| S. No      | Location (reference)                            | Published reference                                                                    | Remarks                                        |
|------------|-------------------------------------------------|----------------------------------------------------------------------------------------|------------------------------------------------|
|            |                                                 |                                                                                        | definitions                                    |
| <b>U29</b> | Goiânia, Brazil (Andrade and colleagues)        | Andrade et al, Int J Epi 2004;33:173-181                                               | Data re-analysed using common case definitions |
| <b>U30</b> | Soweto, South Africa (Madhi and colleagues)     | Madhi et al., Clin Infect Dis. 2005; 40(10): 1511-8.                                   | Data re-analysed using common case definitions |
| <b>U31</b> | Kibera, Nairobi, Kenya (Breiman and colleagues) | Feikin et al., PLoS One 2011; 6:e16085<br>Katz MA et al., J Infect Dis 2012 (In press) | Data re-analysed using common case definitions |
| <b>U32</b> | Multicentre, Bangladesh (Naheed and colleagues) | Naheed et al., Clin Infect Dis. 2009 Mar 1; 48 Suppl 2:S82-9.                          | Data re-analysed using common case definitions |

**Table A3: Incidence estimates of hospitalised severe ALRI in children younger than 5 years from published and unpublished studies by World Health Organization regions**

| Location; population characteristic; study period (reference)                                                             | Study population (n)               | Case definition                                                                                                           | Incidence of hospitalised severe ALRI <sup>†</sup> (per 1000 children per year) <sup>§</sup> |             |
|---------------------------------------------------------------------------------------------------------------------------|------------------------------------|---------------------------------------------------------------------------------------------------------------------------|----------------------------------------------------------------------------------------------|-------------|
|                                                                                                                           |                                    |                                                                                                                           | 0-11 months                                                                                  | 0-59 months |
| Africa                                                                                                                    |                                    |                                                                                                                           |                                                                                              |             |
| Kassena-Nankana District, Ghana; rural; Jun 1990- Aug 1991 (Morris and colleagues)                                        | Defined population base (n=1439)   | Physician diagnosed ALRI                                                                                                  | 56.8                                                                                         | 20.9        |
| Western Region, The Gambia; mixed rural-urban; Mar 1993 - Mar 1996 <sup>25**</sup>                                        | Defined population base (n=21358)  | Physician diagnosed ALRI                                                                                                  | (21.6)                                                                                       | (8)         |
| Soweto, South Africa; urban; Mar 1998 - Nov 2001 <sup>26 †††</sup>                                                        | Defined population base (n=19914)  | Physician diagnosed ALRI                                                                                                  | (96.5)                                                                                       | 35.7        |
| Manhiça, Mozambique; rural; Feb 1999 - Jan 2000 <sup>9</sup>                                                              | Defined population base (n=6020)   | Physician diagnosed ALRI                                                                                                  | 126                                                                                          | 68          |
| Bamako, Mali; urban; Jan 2000 - Dec 2000 <sup>1</sup>                                                                     | Census-derived estimate (n=200160) | Physician diagnosed ALRI                                                                                                  | 10                                                                                           | 3.5         |
| Agincourt, South Africa; rural; Apr 2000 - Mar 2001 <sup>9</sup>                                                          | Defined population base (n=8258)   | Physician diagnosed ALRI                                                                                                  | 332                                                                                          | 80          |
| Bondo district, Kenya; rural; Jan 2001 - Dec 2003 <sup>10</sup>                                                           | Census-derived estimate (n=52200)  | Physician diagnosed ALRI                                                                                                  | 13.7                                                                                         | 7           |
| Upper River Division and Central River Division, The Gambia; rural; Feb 2002-Apr 2004 (Zaman and colleagues) <sup>‡</sup> | Defined population base (n=5040)   | Cough or difficulty breathing and chest wall indrawing or grunting                                                        | 27.8                                                                                         | (10.3)      |
| Kilifi District, Kenya; rural; Apr 2002 - Dec 2008 (Moisi and colleagues) <sup>§§</sup>                                   | Defined population base (n=45600)  | Acute cough / difficulty in breathing AND chest indrawing or tachypnea (>60 breaths per minute) in infants aged <2 months | 61.1                                                                                         | 19.9        |

<sup>‡</sup> ALRI= acute lower respiratory infection

<sup>§</sup> Data in parentheses are computed incidence estimates from data imputation

<sup>\*\*</sup> Included children from 2 months of age

<sup>††</sup> Excluded neonates (0-27 days)

<sup>†††</sup> Incidence rates adjusted for HIV prevalence (0-4 years) and HAART coverage in 2008 included in meta-analysis

<sup>§§</sup> Day 0 excluded

| Location; population characteristic; study period (reference)                                            | Study population (n)               | Case definition                                                                                                                                                                     | Incidence of hospitalised severe ALRI <sup>†</sup> (per 1000 children per year) <sup>§</sup> |             |
|----------------------------------------------------------------------------------------------------------|------------------------------------|-------------------------------------------------------------------------------------------------------------------------------------------------------------------------------------|----------------------------------------------------------------------------------------------|-------------|
|                                                                                                          |                                    |                                                                                                                                                                                     | 0-11 months                                                                                  | 0-59 months |
| Manhiça district, Mozambique; rural; Mar 2004 - Mar 2006 (Roca and colleagues)                           | Defined population base (n=4954)   | Age≥2 months- cough or difficult breathing with chest wall indrawing in hospitalised children.<br>Age<2 months- cough or difficult breathing with tachypnea or chest wall indrawing | 65.3                                                                                         | (24.2)      |
| Bondo district, Nyanza province, Kenya; rural; Jun 2007 - May 2009 (Ope and colleagues) <sup>‡</sup>     | Census-derived estimate (n=160417) | Physician diagnosed ALRI                                                                                                                                                            | 28.6                                                                                         | 16.8        |
| Upper River Region, The Gambia; rural; 12 May 2008 - 11 May 2009 (Mackenzie and colleagues) <sup>‡</sup> | Defined population base (n=27086)  | Cough or difficult breathing with / without chest wall indrawing<br>Physician diagnosed ALRI<br>OR<br>Age ≥2 months- Cough or difficult breathing with chest wall indrawing;        | 86.4                                                                                         | 33.2        |
| Lwak, Kisumu, Kenya; rural; Jun 2008 - May 2009 (Breiman and colleagues)                                 | Census-derived estimate (n=4215)   | Age <2 months- Tachypnea (>60 breaths/ min) or chest wall indrawing                                                                                                                 | 72.9                                                                                         | 98.9        |
| Soweto, South Africa; urban; Feb 2009 - Jan 2010 (Cohen and colleagues) <sup>***</sup>                   | Census-derived estimate (n=123572) | Physician diagnosed ALRI<br>Physician diagnosed ALRI<br>OR<br>Age ≥2 months- Cough or difficult breathing with chest wall indrawing;                                                | 46.6                                                                                         | 14.9        |
| Lwak, Kisumu, Kenya; rural; Jun 2009 - May 2010 (Breiman and colleagues)                                 | Census-derived estimate (n=4428)   | Age <2 months- Tachypnea (>60 breaths/ min) or chest wall indrawing                                                                                                                 | 83.6                                                                                         | 86          |
| <b>Americas</b>                                                                                          |                                    |                                                                                                                                                                                     |                                                                                              |             |
| American Indians and Alaska Natives, USA; rural; Jan 1990- Dec 1995 <sup>3</sup>                         | Census-derived estimate (n=678782) | Hospitalised bronchiolitis (Discharge code- ICD-9 CM 466.1)                                                                                                                         | 61.4                                                                                         | 11.3        |
| Tennessee, USA; mixed rural-urban; 1995-2008 <sup>27</sup>                                               | Census-derived estimate (n=12260)  | Hospitalised bronchiolitis (Discharge code ICD-9 CM 466.1 and / or 480.1)                                                                                                           | 70.7                                                                                         | (31.8)      |

\*\*\* Day 0 and day 1 excluded

| Location; population characteristic; study period (reference)                                                                               | Study population (n)                 | Case definition                                                                                                                                                                          | Incidence of hospitalised severe ALRI <sup>†</sup> (per 1000 children per year) <sup>§</sup> |             |
|---------------------------------------------------------------------------------------------------------------------------------------------|--------------------------------------|------------------------------------------------------------------------------------------------------------------------------------------------------------------------------------------|----------------------------------------------------------------------------------------------|-------------|
|                                                                                                                                             |                                      |                                                                                                                                                                                          | 0-11 months                                                                                  | 0-59 months |
| USA; mixed rural-urban; 1997 - 1999 <sup>20 †††</sup>                                                                                       | Census-derived estimate              | Physician diagnosed ALRI (Discharge code ICD-9 CM 480-487.0)                                                                                                                             | 15                                                                                           | 7.4         |
| USA; mixed rural-urban; Nov 1996 - Oct 1998 <sup>28</sup>                                                                                   | Census-derived estimate              | Physician diagnosed ALRI (Discharge code ICD-9 CM 480-487.0)                                                                                                                             | (40.4)                                                                                       | 18.2        |
| USA; mixed rural-urban; 1997-2000 <sup>21</sup>                                                                                             | Census-derived estimate (n=48127200) | Physician diagnosed ALRI (Discharge code ICD-9 CM 480-487.0)                                                                                                                             | 11.6                                                                                         | 5.2         |
| American Indians and Alaska Natives, USA; rural; 1999 - 2001 <sup>2 §</sup>                                                                 | Census-derived estimate (n=348486)   | Physician diagnosed ALRI (ICD-9 CM 466.1 and / or 480 - 486)                                                                                                                             | 128.7                                                                                        | 32.9        |
| Colorado, USA; mixed rural-urban; Jan 2000 - Dec 2008 (Simoes and colleagues)                                                               | Census-derived estimate (n=374169)   | Physician diagnosed ALRI                                                                                                                                                                 | 43.1                                                                                         | 16.9        |
| Monroe County (New York), Davidson County (Tennessee) and Hamilton County (Ohio), USA; mixed rural-urban; Oct 2000 - Sep 2004 <sup>19</sup> | Census-derived estimate (n=183839)   | Physician diagnosed ALRI                                                                                                                                                                 | 43.9                                                                                         | 15.2        |
| USA; mixed rural-urban; 2001 - 2007 <sup>20 §§</sup>                                                                                        | Census-derived estimate              | Physician diagnosed ALRI (Discharge code ICD-9 CM 480-487.0)                                                                                                                             | 10.2                                                                                         | 5.8         |
| Paysandú and Salto, Uruguay; mixed rural-urban; Jun 2001 - May 2004 (Hortal and colleagues)                                                 | Census-derived estimate (n=61950)    | Physician diagnosed ALRI                                                                                                                                                                 | 77.8                                                                                         | 34.5        |
| Yukon Kuskokwim Delta, Alaska, USA; rural; Jul 2001 - Jun 2007 (Singleton and colleagues)                                                   | Census-derived estimate (n=1850)     | Physician diagnosed ALRI (Discharge diagnosis ICD-9 CM 480-486, 507.0 and 487.0)                                                                                                         | 223.4                                                                                        | (82.6)      |
| Concordia and Parana, Argentina; urban; Nov 2002 - Oct 2005 (Ruvinsky and colleagues)                                                       | Census-derived estimate (n=12500)    | Acute cough / difficulty in breathing AND chest indrawing or tachypnea (>60 breaths per minute) in infants aged <2 months                                                                | 30.3                                                                                         | 14.2        |
| San Lorenzo & Comitancillo, Guatemala; rural; Dec 2002 - Dec 2004 (Bruce and colleagues) <sup>†††</sup>                                     | Defined population base (n=518)      | Cough or difficult breathing with lower chest wall indrawing in children >2 months of age OR cough or difficult breathing with tachypnea (60 breaths / min.) in a child <2 months of age | 49.8                                                                                         | (18.4)      |

<sup>†††</sup> Detailed age specific incidence estimates obtained directly from authors

<sup>†††</sup> All eligible subjects were followed up weekly at home by trained field workers who referred children with findings suggestive of respiratory disease to the community clinics and 70-80% of these were attended by a physician

| Location; population characteristic; study period (reference)                                                   | Study population (n)               | Case definition                                                                                                              | Incidence of hospitalised severe ALRI <sup>†</sup> (per 1000 children per year) <sup>§</sup> |             |
|-----------------------------------------------------------------------------------------------------------------|------------------------------------|------------------------------------------------------------------------------------------------------------------------------|----------------------------------------------------------------------------------------------|-------------|
|                                                                                                                 |                                    |                                                                                                                              | 0-11 months                                                                                  | 0-59 months |
| United States; 2003 <sup>29</sup>                                                                               | Census-derived estimate            | Physician diagnosed ALRI (Discharge code ICD-9 CM 022.1, 031.0, 033, 095.1, 466, 480-487, 510, 511.1, 513, 517.1, 770.0)     | 41.4                                                                                         | 18.6        |
| Pilar, (Buenos Aires Province), Argentina; mixed rural-urban; 2003 - 2005 (Gentile and colleagues) <sup>§</sup> | Census-derived estimate (n=40814)  | Physician diagnosed ALRI                                                                                                     | 35.5                                                                                         | 10.5        |
| USA; mixed rural-urban; 2003-2006 <sup>21</sup>                                                                 | Census-derived estimate            | Physician diagnosed ALRI (Discharge code ICD-9 CM 480-487.0)                                                                 | 9.3                                                                                          | 4.8         |
| San José, Costa Rica; urban; Apr 2007 - Apr 2009 (Arguedas and colleagues) <sup>§</sup>                         | Census-derived estimate (n=64992)  | Physician diagnosed ALRI                                                                                                     | 10                                                                                           | (3.7)       |
| Goiânia, Brazil; urban; May 17 2007 - May 16 2009 (Andrade and colleagues) <sup>§</sup>                         | Census-derived estimate (n=56146)  | Physician diagnosed ALRI                                                                                                     | 58.4                                                                                         | (21.6)      |
| Multicentre, El Salvador; mixed rural-urban; Jan 2007 - Dec 2008 (Clara and colleagues)                         | Census-derived estimate (n=557088) | Hospitalised ALRI (Discharge diagnosis ICD-10 CM J10, J11, J09-J18.9, J20, J21, J22, J80, J96. For new-borns also P23-P23.9) | 95.3                                                                                         | 28          |
|                                                                                                                 |                                    | Physician diagnosed ALRI                                                                                                     |                                                                                              |             |
|                                                                                                                 |                                    | OR                                                                                                                           |                                                                                              |             |
| Santa Rosa, Guatemala; mixed rural-urban; Nov 2007 - Dec 2008 (McCracken and colleagues)                        | Census-derived estimate (n=12700)  | age 2-59 months- cough or difficulty breathing with chest wall indrawing; age < 2months- RR>60/min or chest wall indrawing   | 38.6                                                                                         | 14.7        |
| Paysandú and Salto, Uruguay; mixed rural-urban; Jan 2009 - Dec 2009 (Hortal and colleagues)                     | Census-derived estimate (n=20650)  | Physician diagnosed ALRI                                                                                                     | 126.1                                                                                        | 44.7        |
| Colorado, USA; mixed rural-urban; Jan 2009 - Dec 2009 (Simoes and colleagues)                                   | Census-derived estimate (n=360188) | Physician diagnosed ALRI                                                                                                     | 37.9                                                                                         | 17.6        |
|                                                                                                                 |                                    | Physician diagnosed ALRI                                                                                                     |                                                                                              |             |
|                                                                                                                 |                                    | OR                                                                                                                           |                                                                                              |             |
| Santa Rosa, Guatemala; mixed rural-urban; Jan 2009 - Nov 2010 (McCracken and colleagues)                        | Census-derived estimate (n=21950)  | age 2-59 months- cough or difficulty breathing with chest wall indrawing; age < 2months- RR>60/min or chest wall indrawing   | 99.8                                                                                         | 30.8        |
| Quetzaltenango, Guatemala; mixed rural-urban; Feb 2009 - Nov 2010 (McCracken and colleagues)                    | Census-derived estimate (n=53030)  | Physician diagnosed ALRI                                                                                                     |                                                                                              |             |
|                                                                                                                 |                                    | OR                                                                                                                           |                                                                                              |             |
|                                                                                                                 |                                    | age 2-59 months- cough or difficulty breathing with                                                                          | 33.2                                                                                         | 9.8         |

| Location; population characteristic; study period (reference)                             | Study population (n)                | Case definition                                                                                                                                                                                                         | Incidence of hospitalised severe ALRI <sup>†</sup> (per 1000 children per year) <sup>§</sup> |             |
|-------------------------------------------------------------------------------------------|-------------------------------------|-------------------------------------------------------------------------------------------------------------------------------------------------------------------------------------------------------------------------|----------------------------------------------------------------------------------------------|-------------|
|                                                                                           |                                     |                                                                                                                                                                                                                         | 0-11 months                                                                                  | 0-59 months |
|                                                                                           |                                     | chest wall indrawing; age < 2months- RR>60/min or chest wall indrawing                                                                                                                                                  |                                                                                              |             |
| Yukon Kuskokwim Delta, Alaska, USA; rural; Jul 2009 - Jun 2010 (Singleton and colleagues) | Census-derived estimate (n=1850)    | Hospitalised ALRI (Discharge diagnosis ICD-9 CM 480-486, 507.0 and 487.0)                                                                                                                                               | 173.7                                                                                        | (64.3)      |
| Multicentre, El Salvador; mixed rural-urban; Jan 2009 - Dec 2010 (Clara and colleagues)   | Census-derived estimate (n=562170)  | Hospitalised ALRI (Discharge diagnosis ICD-10 CM J10, J11, J09-J18.9, J20, J21, J22, J80, J96. For new-borns also P23-P23.9)                                                                                            | 106.9                                                                                        | 33.7        |
| Eastern Mediterranean                                                                     |                                     |                                                                                                                                                                                                                         |                                                                                              |             |
| Multicentre, Pakistan; peri-urban; Feb 2002 - Jan 2003 <sup>4†</sup>                      | Census-derived estimate (n=13364)   | Cough or difficulty breathing plus any danger sign (inability to feed or drink, vomiting everything, convulsions, lethargy or unconsciousness) or chest indrawing or stridor                                            | 19.8                                                                                         | 10.3        |
| Karachi, Pakistan; mixed rural-urban; Feb 2007- May 2008 <sup>5</sup>                     | Defined population base (n=3950)    | Cough and / or difficult breathing with or without tachypnea AND chest indrawing or stridor or general danger signs (inability to breast feed or drink, vomits everything, convulsion, lethargy, loss of consciousness) | 40                                                                                           | 14.7        |
| Europe                                                                                    |                                     |                                                                                                                                                                                                                         |                                                                                              |             |
| Scotland, United Kingdom; mixed rural-urban; Jan 1981 - Dec 2005 <sup>30</sup>            | Census-derived estimate (n=7679789) | Physician diagnosed ALRI (Discharge code-ICD-9 CM 480-486.0 and ICD-10-AM J12-18)                                                                                                                                       | 3.7                                                                                          | 2.2         |
| Kuopio, Finland; mixed rural-urban; Sep 1981 - Aug 1982 <sup>31</sup><br><sup>§</sup>     | Census-derived estimate (n=2917)    | Physician diagnosed ALRI                                                                                                                                                                                                | (41.9)                                                                                       | 18.9        |
| Spain; mixed rural-urban; Jan 1995 - Dec 1996 <sup>32</sup>                               | Census-derived estimate (n=3213968) | Physician diagnosed ALRI (Discharge code- ICD-9 CM 480-486.0)                                                                                                                                                           | (11)                                                                                         | 4.9         |
| Spain; mixed rural-urban; 1995-1998 <sup>33</sup>                                         | Census-derived estimate (n=7684928) | Physician diagnosed ALRI (Discharge code- ICD-9 CM 003.22, 052.1, 055.1, 073.0, 083.0, 480-487.0)                                                                                                                       | (9.3)                                                                                        | 4.2         |
| Valencia, Spain; urban; Jan 1995- Dec 2000 <sup>34</sup>                                  | Defined population base (n=654)     | Physician diagnosed ALRI                                                                                                                                                                                                | (15.6)                                                                                       | 7           |
| Valencia, Spain; mixed rural-urban; 1995 - 2001 <sup>35</sup>                             | Census-derived estimate (n=1582398) | Physician diagnosed ALRI (Discharge code- ICD-9 CM 481, 485, 486)                                                                                                                                                       | (11.5)                                                                                       | 5.2         |

| Location; population characteristic; study period (reference)                        | Study population (n)                | Case definition                                                                                                                                                 | Incidence of hospitalised severe ALRI <sup>†</sup> (per 1000 children per year) <sup>§</sup> |             |
|--------------------------------------------------------------------------------------|-------------------------------------|-----------------------------------------------------------------------------------------------------------------------------------------------------------------|----------------------------------------------------------------------------------------------|-------------|
|                                                                                      |                                     |                                                                                                                                                                 | 0-11 months                                                                                  | 0-59 months |
| Gipuzoka, Spain; mixed rural-urban; Jul 1996 - Jun 2000 <sup>36</sup>                | Census-derived estimate (n=62800)   | Physician diagnosed ALRI (Discharge code-ICD-9 CM 466.1)                                                                                                        | (22.5)                                                                                       | 10.1        |
| Kiel, Germany; urban; Jul 1996 - Jun 2000 <sup>18</sup>                              | Census-derived estimate (n=53655)   | Physician diagnosed ALRI                                                                                                                                        | 11.1                                                                                         | 6.8         |
| Netherlands; mixed rural-urban; May 1999 - Apr 2000 <sup>37</sup>                    | Census-derived estimate (n=971471)  | Physician diagnosed ALRI (Discharge code-ICD-9 CM 480-486.0)                                                                                                    | (6.9)                                                                                        | 3.1         |
| Multicentre, Germany; mixed rural-urban; Nov 1999 - Oct 2001 <sup>23 §§</sup>        | Census-derived estimate (n=2374600) | Physician diagnosed ALRI                                                                                                                                        | 51.7                                                                                         | (23.2)      |
| Liguria, Italy; mixed rural-urban; May 2000 - Apr 2004 <sup>38</sup>                 | Census-derived estimate (n=16973)   | Physician diagnosed ALRI (Discharge code- ICD-9 CM 480-487.0)                                                                                                   | (9.2)                                                                                        | (4.1)       |
| Gipuzoka, Spain; mixed rural-urban; Jul 2004 - Jun 2007 <sup>22</sup>                | Census-derived estimate (n=135135)  | Physician diagnosed ALRI                                                                                                                                        | 46                                                                                           | (20.7)      |
| Netherlands; mixed rural-urban; May 2006 - Apr 2007 <sup>37</sup>                    | Census-derived estimate (n=971471)  | Physician diagnosed ALRI (Discharge code- ICD-9 CM 480-486.0)                                                                                                   | (7.6)                                                                                        | 3.4         |
| Limousin, France; mixed rural-urban; Sep 2007 - Aug 2008 <sup>39</sup>               | Census-derived estimate (n=7292)    | Hospitalised bronchiolitis                                                                                                                                      | 17.7                                                                                         | (8)         |
| South East Asia                                                                      |                                     |                                                                                                                                                                 |                                                                                              |             |
| Matlab, Bangladesh; rural; May 1988 - Apr 1989 <sup>40</sup>                         | Defined population base (n=503)     | Cough and / or difficult breathing with or without tachypnea AND chest indrawing                                                                                | (145)                                                                                        | 53.6        |
| Kamalapur, Bangladesh; urban; Apr 1999 - Aug 2000 <sup>41</sup><br><sup>†^ §§§</sup> | Defined population base (n=511)     | Crepitations on inspiration, with respiratory rate >50 breaths / min, with chest indrawing or other danger signs (lethargy, cyanosis, inability to drink)       | (109.6)                                                                                      | (40.5)      |
| Lombok, Indonesia; rural; 1999 - 2002 (Gessner and colleagues)                       | Defined population base (n=38653)   | Cough or difficult breathing with chest wall indrawing OR infant aged < 2 months with increased respiratory rate (≥60 / min.)                                   | 83.6                                                                                         | (30.9)      |
| Matlab, Bangladesh; rural; Jul 1999 - Jun 2001 <sup>6</sup>                          | Defined population base             | Cough and / or difficult breathing with or without tachypnea AND chest indrawing or stridor or general danger signs (inability to breast feed or drink, vomits) | 101.1                                                                                        | 50.2        |

<sup>^</sup> Rates do not include cases with wheezing or rhonchi without crepitations (as these were labelled as bronchiolitis)

<sup>§§§</sup> All eligible subjects were followed up weekly at home by trained Field Research Assistants (FRAs) who referred children with findings suggestive of respiratory disease to the clinic

| Location; population characteristic; study period (reference)                                      | Study population (n)               | Case definition                                                                                                                                                                                                                                                                                                                                        | Incidence of hospitalised severe ALRI <sup>†</sup> (per 1000 children per year) <sup>§</sup> |             |
|----------------------------------------------------------------------------------------------------|------------------------------------|--------------------------------------------------------------------------------------------------------------------------------------------------------------------------------------------------------------------------------------------------------------------------------------------------------------------------------------------------------|----------------------------------------------------------------------------------------------|-------------|
|                                                                                                    |                                    |                                                                                                                                                                                                                                                                                                                                                        | 0-11 months                                                                                  | 0-59 months |
|                                                                                                    | (n=12451)                          | everything, convulsion, lethargy, loss of consciousness)                                                                                                                                                                                                                                                                                               |                                                                                              |             |
| Bhaktapur, Nepal; mixed rural-urban; Jan 2004 - Jun 2007 <sup>42 ‡</sup>                           | Defined population base (n=2100)   | Cough and / or difficult breathing combined with lower chest wall indrawing and admittance to hospital                                                                                                                                                                                                                                                 | (11.7)                                                                                       | (4.3)       |
| Kathmandu, Nepal; urban; Nov 2004 - Mar 2007 <sup>43 ‡^</sup>                                      | Census-derived estimate (n=243345) | Cough and / or difficult breathing with or without tachypnea AND chest indrawing                                                                                                                                                                                                                                                                       | (16.8)                                                                                       | 6.2         |
| Nakhon Phanom and Sa Kaeo provinces, Thailand; rural; Jan 2004 - Dec 2008 (Baggett and colleagues) | Census-derived estimate (n=427163) | Children having evidence of acute infection (reported fever or chills, documented T>38.2C or <35.5C, or abnormal WBC count or abnormal differential count) and at least one sign or symptom of lower respiratory tract disease (abnormal breath sounds on chest auscultation, tachypnea, cough, sputum production, hemoptysis, chest pain, or dyspnea) | 83.4                                                                                         | 55.2        |
| Mirzapur, Bangladesh; rural; Oct 2004 - Sept 2008 (Arifeen and colleagues) <sup>§</sup>            | Defined population base (n=41040)  | Cough or difficult breathing with / without chest wall indrawing OR infant aged < 2 months with increased respiratory rate (≥60 / min.)                                                                                                                                                                                                                | 73.9                                                                                         | 19          |
| Patan, Nepal; urban; Apr 2005 - Dec 2006 <sup>44 ‡^</sup>                                          | Census-derived estimate (n=56875)  | Tachypnea AND chest indrawing                                                                                                                                                                                                                                                                                                                          | (17.1)                                                                                       | 6.3         |
| Multicentre, India; rural; Jul 2005 - Mar 2007 (Chandran and colleagues) <sup>§</sup>              | Defined population base (n=15460)  | Cough or difficulty breathing or fast breathing or chest retractions or chest wall indrawing or nasal flaring or grunting or abnormal auscultation                                                                                                                                                                                                     | 69.3                                                                                         | (25.6)      |
| Bangalore, India; urban; Jan 2006 - Dec 2006 <sup>45</sup>                                         | Census-derived estimate (n=150945) | Physician diagnosed ALRI                                                                                                                                                                                                                                                                                                                               | (17.3)                                                                                       | 6.4         |
| Kamalapur, Bangladesh; urban; Jan 2008 - Dec 2008 (Brooks and colleagues) <sup>+++</sup>           | Defined population base (n=4547)   | History of cough with or without documented fever (axillary temperature - ≥ 38°C), WHO specified age specific elevated respiratory rate (0 - <2 months of age RR = ≥60/min, 2 - <12 months of age RR ≥ 50/min and 12 - <60 months of age RR ≥40/min) and chest indrawing                                                                               | 71.7                                                                                         | 24          |
| Multicentre, Bangladesh; rural; Jan 2008 - Dec 2008 (Azziz-Baumgartner and colleagues)             | Defined population base (n=6864)   | Cough or difficult breathing with chest in-drawing or requiring hospitalization                                                                                                                                                                                                                                                                        | 51.3                                                                                         | 14          |
| Kamalapur, Bangladesh; urban; Jan 2009 - Dec 2010 (Brooks and colleagues) <sup>+++</sup>           | Defined population base (n=7200)   | History of cough with or without documented fever (axillary temperature - ≥ 38°C), WHO specified age specific elevated respiratory rate (0 - <2 months of age RR = ≥60/min, 2 - <12 months of age RR ≥ 50/min and 12 - <60 months of age RR ≥40/min) and chest indrawing                                                                               | 58.9                                                                                         | 21          |

| Location; population characteristic; study period (reference)                                      | Study population (n)               | Case definition                                                                                                                                                                                                                                                                                                                                                                        | Incidence of hospitalised severe ALRI <sup>†</sup> (per 1000 children per year) <sup>§</sup> |             |
|----------------------------------------------------------------------------------------------------|------------------------------------|----------------------------------------------------------------------------------------------------------------------------------------------------------------------------------------------------------------------------------------------------------------------------------------------------------------------------------------------------------------------------------------|----------------------------------------------------------------------------------------------|-------------|
|                                                                                                    |                                    |                                                                                                                                                                                                                                                                                                                                                                                        | 0-11 months                                                                                  | 0-59 months |
| Nakhon Phanom and Sa Kaeo provinces, Thailand; rural; Jan 2009 - Dec 2009 (Baggett and colleagues) | Census-derived estimate (n=80240)  | Hospitalised ALRI- children having evidence of acute infection (reported fever or chills, documented Temperature >38.2°C or <35.5°C, or abnormal WBC count or abnormal differential count) and at least one sign or symptom of lower respiratory tract disease (abnormal breath sounds on chest auscultation, tachypnea, cough, sputum production, hemoptysis, chest pain, or dyspnea) | 72.9                                                                                         | 53.9        |
| Ballabgarh, Haryana, India; rural; Aug 2009 - Jul 2010 (Krishnan and colleagues)                   | Census-derived estimate (n=4840)   | Hospitalised cases with either difficulty breathing / shortness of breath OR diagnosis of pneumonia or respiratory infection                                                                                                                                                                                                                                                           | 15                                                                                           | 3.7         |
| Multicentre, Bangladesh; rural; Jan 2009 - Dec 2009 (Azziz-Baumgartner and colleagues)             | Defined population base (n=14037)  | Cough or difficult breathing with chest in-drawing or requiring hospitalization                                                                                                                                                                                                                                                                                                        | 49.8                                                                                         | 13.3        |
| <b>Western Pacific</b>                                                                             |                                    |                                                                                                                                                                                                                                                                                                                                                                                        |                                                                                              |             |
| Alabang (Metro Manila), Philippines; urban; Apr 1985 - Mar 1987 <sup>46</sup>                      | Defined population base (n=709)    | Cough and / or difficult breathing with or without tachypnea AND chest indrawing                                                                                                                                                                                                                                                                                                       | (64.8)                                                                                       | 24          |
| Western Australia, Australia; mixed rural-urban; 1988-1993 <sup>11</sup>                           | Census-derived estimate (n=757610) | Physician diagnosed ALRI                                                                                                                                                                                                                                                                                                                                                               | 32.1                                                                                         | 10.2        |
| Zhejiang, China; mixed rural-urban; Apr 1990 - Mar 1991 <sup>13</sup>                              | Defined population base (n=7472)   | Cough and / or difficult breathing with or without tachypnea AND chest indrawing                                                                                                                                                                                                                                                                                                       | 25                                                                                           | 8.6         |
| Zhejiang, China; rural; Apr 1990 - Mar 1991 <sup>47</sup>                                          | Defined population base (n=1215)   | Cough and / or difficult breathing with or without tachypnea AND chest indrawing                                                                                                                                                                                                                                                                                                       | (26.7)                                                                                       | 9.9         |
| Heilongjiang, China; rural; 1991 - 1993 <sup>48</sup>                                              | Census-derived estimate (n=9901)   | Cough and / or difficult breathing with or without tachypnea AND chest indrawing                                                                                                                                                                                                                                                                                                       | (137.3)                                                                                      | 50.8        |
| Shandong, China; mixed rural-urban; Jan 1992 - Jan 1993 <sup>49</sup>                              | Defined population base (n=16751)  | Cough and / or difficult breathing with or without tachypnea AND chest indrawing                                                                                                                                                                                                                                                                                                       | (5.5)                                                                                        | 2           |
| Chongqing, China; mixed rural-urban; Feb 1992 - Jan 1993 <sup>14</sup>                             | Census-derived estimate (n=2246)   | Cough and / or difficult breathing with or without tachypnea AND chest indrawing                                                                                                                                                                                                                                                                                                       | 69.5                                                                                         | 31.2        |
| Heilongjiang, China; rural; Jan 1993 - Dec 1993 <sup>50</sup>                                      | Census-derived estimate (n=5812)   | Cough and / or difficult breathing with or without tachypnea AND chest indrawing                                                                                                                                                                                                                                                                                                       | (17.2)                                                                                       | 6.4         |

| Location; population characteristic; study period (reference)                                   | Study population (n)               | Case definition                                                                     | Incidence of hospitalised severe ALRI <sup>†</sup> (per 1000 children per year) <sup>§</sup> |             |
|-------------------------------------------------------------------------------------------------|------------------------------------|-------------------------------------------------------------------------------------|----------------------------------------------------------------------------------------------|-------------|
|                                                                                                 |                                    |                                                                                     | 0-11 months                                                                                  | 0-59 months |
| Auckland, New Zealand; urban; Jul 1993 - Jun 1996 <sup>51</sup>                                 | Census-derived estimate (n=50280)  | Physician diagnosed ALRI                                                            | (24.2)                                                                                       | 10.9        |
| Fujian, China; rural; 1994 - 1995 <sup>52</sup>                                                 | Census-derived estimate (n=9323)   | Cough and / or difficult breathing with or without tachypnea AND chest indrawing    | (65.5)                                                                                       | 24.2        |
| Henan, China; rural; Jan 1994 - Dec 1994 <sup>17</sup>                                          | Defined population base (n=7917)   | Cough and / or difficult breathing with or without tachypnea AND chest indrawing    | 52.1                                                                                         | 23.2        |
| Jiangsu, China; rural; Feb 1994 - Jan 1995 <sup>15</sup>                                        | Census-derived estimate (n=11729)  | Cough and / or difficult breathing with or without tachypnea AND chest indrawing    | 33.8                                                                                         | 9.4         |
| Henan, China; rural; Jul 1994 - Jun 1996 <sup>53</sup>                                          | Census-derived estimate (n=29590)  | Cough and / or difficult breathing with or without tachypnea AND chest indrawing    | (128.1)                                                                                      | 47.4        |
| Fujian, China; mixed rural-urban; Oct 1994 - Sep 1995 <sup>16</sup>                             | Census-derived estimate (n=4665)   | Cough and / or difficult breathing with or without tachypnea AND chest indrawing    | 52.5                                                                                         | 24          |
| Yunnan, China; rural; Jan 1995 - Dec 1997 <sup>54</sup>                                         | Census-derived estimate (n=6966)   | Cough and / or difficult breathing with or without tachypnea AND chest indrawing    | (529.2)                                                                                      | 195.9       |
| Shandong, China; mixed rural-urban; Jan 1995 - Dec 2001 <sup>55</sup>                           | Census-derived estimate (n=375629) | Cough and / or difficult breathing with or without tachypnea AND chest indrawing    | (41.9)                                                                                       | 15.5        |
| Shandong, China; mixed rural-urban; 1995 - 2004 <sup>56</sup>                                   | Census-derived estimate (n=537734) | Cough and / or difficult breathing with or without tachypnea AND chest indrawing    | (34.8)                                                                                       | 12.9        |
| Western Australia, Australia; mixed rural-urban; 1996-2005 <sup>24</sup>                        | Census-derived estimate (n=911520) | Physician diagnosed ALRI (Discharge codes ICD-10 J12-J18, B59, B05.2, B37.1, B01.2) | 52                                                                                           | 20.9        |
| Taiwan; 1997-2004 <sup>57</sup> ****                                                            | Census-derived estimate            | Physician diagnosed ALRI (Discharge codes ICD-9 CM 480-487)                         | 49.8                                                                                         | 39.7        |
| Bohol, Philippines; mixed rural-urban; Jul 2000 - Dec 2004 (Lucero and colleagues) <sup>§</sup> | Defined population base (n=6094)   | Cough or difficulty breathing with chest wall indrawing                             | 89.7                                                                                         | (33.2)      |
| Tongatapu, Tonga; mixed rural-urban; Jan 2000 - Dec 2004 <sup>58 §^</sup>                       | Census-derived estimate            | Physician diagnosed ALRI                                                            | (27.2)                                                                                       | 10.1        |

\*\*\*\* Excluded pneumonia in children aged 0-3 days

| Location; population characteristic; study period (reference)                   | Study population (n)                | Case definition                                                 | Incidence of hospitalised severe ALRI* (per 1000 children per year) <sup>§</sup> |             |
|---------------------------------------------------------------------------------|-------------------------------------|-----------------------------------------------------------------|----------------------------------------------------------------------------------|-------------|
|                                                                                 |                                     |                                                                 | 0-11 months                                                                      | 0-59 months |
| Hong Kong, urban; Jan 2000 - Dec 2005 <sup>59</sup>                             | Census-derived estimate (n=2131182) | Physician diagnosed ALRI (Discharge codes ICD-9 CM 481 and 486) | (19.1)                                                                           | 8.6         |
| Suva, Fiji; urban; Jan 2001 - Dec 2002 <sup>60 §</sup>                          | Census-derived estimate (n=20954)   | Physician diagnosed ALRI                                        | (40)                                                                             | 18          |
| NhaTrang district, Vietnam; mixed rural-urban; Apr 2005 - Aug 2006 <sup>7</sup> | Census-derived estimate (n=24641)   | Physician diagnosed ALRI                                        | 69.5                                                                             | 22.6        |
| Tongatapu, Tonga; mixed rural-urban; 2006 - 2007 <sup>58 §</sup>                | Census-derived estimate (n=10322)   | Physician diagnosed ALRI                                        | (19.5)                                                                           | 7.2         |
| NhaTrang city, Vietnam; urban; Mar 2007 – Feb 2008 <sup>8</sup>                 | Census-derived estimate (n=13941)   | Physician diagnosed ALRI                                        | 65.8                                                                             | 34          |

**Table A4: Incidence of hospitalised very severe ALRI in children younger than 5 years from published and unpublished studies by World Health Organization regions**

| Location; population characteristic; study period (reference)                                             | Study population (n)               | Case definition                                                                                                                                                                                                                                                                                  | Incidence of hospitalised very severe ALRI (per 1000 children per year) <sup>*†</sup> |             |
|-----------------------------------------------------------------------------------------------------------|------------------------------------|--------------------------------------------------------------------------------------------------------------------------------------------------------------------------------------------------------------------------------------------------------------------------------------------------|---------------------------------------------------------------------------------------|-------------|
|                                                                                                           |                                    |                                                                                                                                                                                                                                                                                                  | 0-11 months                                                                           | 0-59 months |
| Africa                                                                                                    |                                    |                                                                                                                                                                                                                                                                                                  |                                                                                       |             |
| Soweto, South Africa; urban; Mar 1998 - Nov 2001 <sup>26 ‡§</sup>                                         | Defined population base (n=19914)  | Cough with lower chest wall indrawing and or any of the following signs: feeding difficulties, convulsions, central cyanosis, or encephalopathy                                                                                                                                                  | (62.8)                                                                                | 22.6        |
| Kilifi District, Kenya; rural; Apr 2002 - Dec 2008 (Moisi and colleagues) <sup>**</sup>                   | Defined population base (n=45600)  | Acute cough / difficulty in breathing AND unconscious or prostrated OR SpO <sub>2</sub> <90% in children aged ≥2months and 88% in children aged <2 months                                                                                                                                        | 18.2                                                                                  | 6.5         |
| Manhiça district, Mozambique; rural; Mar 2004 - Mar 2006 (Roca and colleagues)                            | Defined population base (n=4954)   | Cough or difficulty in breathing with one danger sign (difficulty in breastfeeding or drinking, lethargy, or unconsciousness) OR SpO <sub>2</sub> <90% in children aged ≥2months and 88% in children aged <2 months)                                                                             | 33.7                                                                                  | (12.1)      |
| Bondo district, Nyanza province, Kenya; rural; Jun 2007 - May 2009 (Ope and colleagues) <sup>††</sup>     | Census-derived estimate (n=160417) | Cough or difficulty in breathing with one danger sign (cyanosis, difficulty in breastfeeding or drinking, vomiting everything, convulsions, lethargy, or unconsciousness, head nodding)                                                                                                          | 24.2                                                                                  | 13.5        |
| Upper River Region, The Gambia; rural; 12 May 2008 - 11 May 2009 (Mackenzie and colleagues) <sup>††</sup> | Defined population base (n=27086)  | Cough or difficulty in breathing with one danger sign (cyanosis, difficulty in breastfeeding or drinking, vomiting everything, convulsions, lethargy, or unconsciousness, head nodding)                                                                                                          | 35.7                                                                                  | 15.4        |
| Lwak, Kisumu, Kenya; rural; Jun 2008 - May 2009 (Breiman and colleagues)                                  | Census-derived estimate (n=4215)   | Cough or difficulty in breathing with chest wall in-drawing AND any one danger sign (difficulty in breastfeeding or drinking, vomiting everything, convulsions, lethargy, or unconsciousness) OR SpO <sub>2</sub> <90% in children aged ≥2months and 88% in children aged <2 months              | 23.6                                                                                  | 21.3        |
| Lwak, Kisumu, Kenya; rural; Jun 2009 - May 2010 (Breiman and colleagues)                                  | Census-derived estimate (n=4428)   | Cough or difficulty in breathing with chest wall in-drawing AND any one danger sign (difficulty in breastfeeding or drinking, vomiting everything, convulsions, lethargy, or unconsciousness) OR SpO <sub>2</sub> <90% in children aged ≥2months and 88% in children aged <2 months              | 46.9                                                                                  | 31.6        |
| Americas                                                                                                  |                                    |                                                                                                                                                                                                                                                                                                  |                                                                                       |             |
| Colorado, USA; mixed rural-urban; Jan 2000 - Dec 2008 (Simoes and colleagues)                             | Census-derived estimate (n=374169) | Colorado Hospital Association (CHA) severity codes 3 and 4 (the codes range from 0 to 4, 0=Not Applicable, 1=Minor, 2=Moderate, 3=Major, 4=Extreme). This classification system was developed by the Pediatric Health Information system (PHIS) team of the Child Health Corporation of America. | 8.6                                                                                   | 3           |
| Goiânia, Brazil; urban; May 2000 - Aug 2001 (Andrade and colleagues) <sup>††</sup>                        | Census-derived estimate (n=87705)  | Hospitalised ALRI with cyanosis or nasal flaring                                                                                                                                                                                                                                                 | 1.2                                                                                   | 0.4         |
| Paysandú and Salto, Uruguay; mixed rural-urban; Jun 2001 - May 2004 (Hortal and colleagues)               | Census-derived estimate (n=61950)  | Hospitalised ALRI admitted to intensive care unit                                                                                                                                                                                                                                                | 5.9                                                                                   | 1.6         |

\* ALRI= acute lower respiratory infection

† Data in parentheses are computed incidence estimates from data imputation

‡ Excluded neonates (0-27 days)

§ Incidence rates adjusted for HIV prevalence (0-4 years) and HAART coverage in 2008 included in meta-analysis

\*\* Day 0 excluded

†† Included children from 2 months of age

| Location; population characteristic; study period (reference)                                                   | Study population (n)               | Case definition                                                                                                                                                                                                                                                              | Incidence of hospitalised very severe ALRI (per 1000 children per year) <sup>*†</sup> |             |
|-----------------------------------------------------------------------------------------------------------------|------------------------------------|------------------------------------------------------------------------------------------------------------------------------------------------------------------------------------------------------------------------------------------------------------------------------|---------------------------------------------------------------------------------------|-------------|
|                                                                                                                 |                                    |                                                                                                                                                                                                                                                                              | 0-11 months                                                                           | 0-59 months |
| Yukon Kuskokwim Delta, Alaska, USA; rural; Jul 2001 - Jun 2007 (Singleton and colleagues)                       | Census-derived estimate (n=1850)   | Hospitalised ALRI who were mechanically ventilated                                                                                                                                                                                                                           | 14.9                                                                                  | (5.4)       |
| Concordia and Parana, Argentina; urban; Nov 2002 - Oct 2005 (Ruvinsky and colleagues)                           | Census-derived estimate (n=12500)  | Cough or difficulty in breathing AND one danger sign (cyanosis, difficulty in breastfeeding or drinking, vomiting everything, convulsions, lethargy, or unconsciousness, head nodding) OR SpO <sub>2</sub> <90% in children aged ≥2months and 88% in children aged <2 months | 3.4                                                                                   | 0.9         |
| San Lorenzo & Comitancillo, Guatemala; rural; Dec 2002 - Dec 2004 (Bruce and colleagues) <sup>††</sup>          | Defined population base (n=518)    | Cough or difficult breathing with lower chest wall indrawing with inability to drink, or central cyanosis, or convulsions, or unconscious / very drowsy or persistent vomiting                                                                                               | 49.8                                                                                  | (18.4)      |
| Pilar, (Buenos Aires Province), Argentina; mixed rural-urban; 2003 - 2005 (Gentile and colleagues) <sup>†</sup> | Census-derived estimate (n=40814)  | Hospitalised ALRI with SpO <sub>2</sub> <90% in children aged ≥2months and 88% in children aged <2 months                                                                                                                                                                    | 2.4                                                                                   | 0.9         |
| Goiânia, Brazil; urban; May 17 2007 - May 16 2009 (Andrade and colleagues) <sup>†</sup>                         | Census-derived estimate (n=56146)  | Hospitalised ALRI admitted to intensive care unit                                                                                                                                                                                                                            | 1.2                                                                                   | (0.4)       |
| Santa Rosa, Guatemala; mixed rural-urban; Nov 2007 - Dec 2008 (McCracken and colleagues)                        | Census-derived estimate (n=12700)  | Cough or difficulty breathing with danger sign (inability to feed or drink, convulsions, lethargic, vomiting) OR SpO <sub>2</sub> <90% in children aged ≥2months and 88% in children aged <2 months                                                                          | 35.8                                                                                  | 12.9        |
| Paysandú and Salto, Uruguay; mixed rural-urban; Jan 2009 - Dec 2009 (Hortal and colleagues)                     | Census-derived estimate (n=20650)  | Hospitalised ALRI admitted to intensive care unit                                                                                                                                                                                                                            | 8.8                                                                                   | 2.3         |
| Colorado, USA; mixed rural-urban; Jan 2009 - Dec 2009 (Simoes and colleagues)                                   | Census-derived estimate (n=360188) | Colorado Hospital Association (CHA) severity codes 3 and 4                                                                                                                                                                                                                   | 8.8                                                                                   | 3.2         |
| Santa Rosa, Guatemala; mixed rural-urban; Jan 2009 - Nov 2010 (McCracken and colleagues)                        | Census-derived estimate (n=21950)  | Cough or difficulty breathing with danger sign (inability to feed or drink, convulsions, lethargic, vomiting) OR SpO <sub>2</sub> <90% in children aged ≥2months and 88% in children aged <2 months                                                                          | 51.1                                                                                  | 15.6        |
| Quetzaltenango, Guatemala; mixed rural-urban; Feb 2009 - Nov 2010 (McCracken and colleagues)                    | Census-derived estimate (n=53030)  | Cough or difficulty breathing with danger sign (inability to feed or drink, convulsions, lethargic, vomiting) OR SpO <sub>2</sub> <90% in children aged ≥2months and 88% in children aged <2 months                                                                          | 30                                                                                    | 8.9         |
| Yukon Kuskokwim Delta, Alaska, USA; rural; Jul 2009 - Jun 2010 (Singleton and colleagues)                       | Census-derived estimate (n=1850)   | Hospitalised ALRI who were mechanically ventilated                                                                                                                                                                                                                           | 4.7                                                                                   | (1.7)       |
| <b>South-East Asia</b>                                                                                          |                                    |                                                                                                                                                                                                                                                                              |                                                                                       |             |
| Kathmandu, Nepal; urban; Nov 2004 - Mar 2007 <sup>43 ††§§</sup>                                                 | Census-derived estimate (n=243345) | Tachypnea AND any of the following danger signs: convulsion, lethargy, central cyanosis                                                                                                                                                                                      | (2.2)                                                                                 | 0.8         |

<sup>††</sup> All eligible subjects were followed up weekly at home by trained field workers who referred children with findings suggestive of respiratory disease to the community clinics and 70-80% of these were attended by a physician

<sup>§§</sup> Rates do not include cases with wheezing or rhonchi without crepitations as these were labelled bronchiolitis

| Location; population characteristic; study period (reference)                                      | Study population (n)               | Case definition                                                                                                                                           | Incidence of hospitalised very severe ALRI (per 1000 children per year) <sup>*†</sup> |             |
|----------------------------------------------------------------------------------------------------|------------------------------------|-----------------------------------------------------------------------------------------------------------------------------------------------------------|---------------------------------------------------------------------------------------|-------------|
|                                                                                                    |                                    |                                                                                                                                                           | 0-11 months                                                                           | 0-59 months |
| Nakhon Phanom and Sa Kaeo provinces, Thailand; rural; Jan 2004 - Dec 2008 (Baggett and colleagues) | Census-derived estimate (n=427163) | Hospitalised ALRI with SpO <sub>2</sub> <90% or requiring intubation                                                                                      | 5.3                                                                                   | 1.7         |
| Mirzapur, Bangladesh; rural; Oct 2004 - Sept 2008 (Arifeen and colleagues) <sup>**</sup>           | Defined population base (n=41040)  | Hospitalised ALRI with any of danger signs -cyanosis, inability to feed or drink, convulsions                                                             | 26.7                                                                                  | 5.7         |
| Patan, Nepal; urban; Apr 2005 - Dec 2006 <sup>44 ††§§</sup>                                        | Census-derived estimate (n=56875)  | Tachypnea AND any of the following danger signs: convulsion, lethargy, central cyanosis                                                                   | (2.6)                                                                                 | 0.9         |
| Multicentre, India; rural; Jul 2005 - Mar 2007 (Chandran and colleagues) <sup>‡</sup>              | Defined population base (n=15460)  | Hospitalised ALRI with at least one of the following: feeding difficulty or lethargy or seizure or central cyanosis or head nodding                       | 56.7                                                                                  | (20.4)      |
| Kamalapur, Bangladesh; urban; Jan 2008 - Dec 2008 (Brooks and colleagues) <sup>***</sup>           | Defined population base (n=4547)   | Hospitalised ALRI with danger signs (unable to drink/eat, convulsion, cyanosis, lethargy etc.)                                                            | 9.6                                                                                   | 4.8         |
| Multicentre, Bangladesh; rural; Jan 2008 - Dec 2008 (Azziz-Baumgartner and colleagues)             | Defined population base (n=6864)   | Hospitalised ALRI and any danger sign (i.e. convulsions, cyanosis, inability to drink or feed, intractable vomiting, lethargy, and mental status changes) | 32.5                                                                                  | 8.7         |
| Kamalapur, Bangladesh; urban; Jan 2009 - Dec 2010 (Brooks and colleagues) <sup>***</sup>           | Defined population base (n=7200)   | Hospitalised ALRI with danger signs (unable to drink/eat, convulsion, cyanosis, lethargy etc.)                                                            | 13.5                                                                                  | 3.2         |
| Nakhon Phanom and Sa Kaeo provinces, Thailand; rural; Jan 2009 - Dec 2009 (Baggett and colleagues) | Census-derived estimate (n=80240)  | Hospitalised ALRI with SpO <sub>2</sub> <90% or requiring intubation                                                                                      | 6.5                                                                                   | 2.8         |
| Multicentre, Bangladesh; rural; Jan 2009 - Dec 2009 (Azziz-Baumgartner and colleagues)             | Defined population base (n=14037)  | Hospitalised ALRI and any danger sign (i.e. convulsions, cyanosis, inability to drink or feed, intractable vomiting, lethargy, and mental status changes) | 31.1                                                                                  | 8.4         |
| <b>Western Pacific Region</b>                                                                      |                                    |                                                                                                                                                           |                                                                                       |             |
| Heilongjiang, China; rural; 1991 - 1993 <sup>48</sup>                                              | Census-derived estimate (n=9901)   | Hospitalised ALRI and any danger sign (i.e. convulsions, cyanosis, inability to drink or feed, intractable vomiting, lethargy, and loss of consciousness) | (64.3)                                                                                | 23          |
| Shangdong, China; mixed rural-urban; Jan 1992 - Jan 1993 <sup>49</sup>                             | Defined population base (n=16751)  | Hospitalised ALRI and any danger sign (i.e. convulsions, cyanosis, inability to drink or feed, intractable vomiting, lethargy, and loss of consciousness) | (1)                                                                                   | 0.4         |
| Chongqing, China; mixed rural-urban; Feb 1992 - Jan 1993 <sup>14</sup>                             | Census-derived estimate (n=2246)   | Hospitalised ALRI and any danger sign (i.e. convulsions, cyanosis, inability to drink or feed, intractable vomiting, lethargy, and loss of consciousness) | 19                                                                                    | 6.2         |
| Heilongjiang, China; rural; Jan 1993 - Dec 1993 <sup>50</sup>                                      | Census-derived estimate (n=5812)   | Hospitalised ALRI and any danger sign (i.e. convulsions, cyanosis, inability to drink or feed, intractable vomiting, lethargy, and loss of consciousness) | (7.2)                                                                                 | 2.6         |
| Fujian, China; rural; 1994 - 1995 <sup>52</sup>                                                    | Census-derived estimate (n=9323)   | Hospitalised ALRI and any danger sign (i.e. convulsions, cyanosis, inability to drink or feed, intractable vomiting, lethargy, and loss of consciousness) | (30.7)                                                                                | 11.1        |

\*\*\* All eligible subjects were followed up weekly at home by trained field research assistants who referred children with findings suggestive of respiratory disease to the clinic

| Location; population characteristic; study period (reference)                                   | Study population (n)              | Case definition                                                                                                                                                                                                                                                                                                                                                                                                                                                                                                                                                                                   | Incidence of hospitalised very severe ALRI (per 1000 children per year) <sup>*†</sup> |             |
|-------------------------------------------------------------------------------------------------|-----------------------------------|---------------------------------------------------------------------------------------------------------------------------------------------------------------------------------------------------------------------------------------------------------------------------------------------------------------------------------------------------------------------------------------------------------------------------------------------------------------------------------------------------------------------------------------------------------------------------------------------------|---------------------------------------------------------------------------------------|-------------|
|                                                                                                 |                                   |                                                                                                                                                                                                                                                                                                                                                                                                                                                                                                                                                                                                   | 0-11 months                                                                           | 0-59 months |
| Henan, China; rural; Jan 1994 - Dec 1994 <sup>17</sup>                                          | Defined population base (n=7917)  | Hospitalised ALRI and any danger sign (i.e. convulsions, cyanosis, inability to drink or feed, intractable vomiting, lethargy, and loss of consciousness)                                                                                                                                                                                                                                                                                                                                                                                                                                         | 30.7                                                                                  | 14.4        |
| Henan, China; rural; Jul 1994 - Jun 1996 <sup>53</sup>                                          | Census-derived estimate (n=29590) | Hospitalised ALRI and any danger sign (i.e. convulsions, cyanosis, inability to drink or feed, intractable vomiting, lethargy, and loss of consciousness)                                                                                                                                                                                                                                                                                                                                                                                                                                         | (18.9)                                                                                | 6.8         |
| Fujian, China; mixed rural-urban; Oct 1994 - Sep 1995 <sup>16</sup>                             | Census-derived estimate (n=4665)  | Hospitalised ALRI and any danger sign (i.e. convulsions, cyanosis, inability to drink or feed, intractable vomiting, lethargy, and loss of consciousness)                                                                                                                                                                                                                                                                                                                                                                                                                                         | 24.1                                                                                  | 11.2        |
| Yunnan, China; rural; Jan 1995 - Dec 1997 <sup>54</sup>                                         | Census-derived estimate (n=6966)  | Hospitalised ALRI and any danger sign (i.e. convulsions, cyanosis, inability to drink or feed, intractable vomiting, lethargy, and loss of consciousness)                                                                                                                                                                                                                                                                                                                                                                                                                                         | (118.4)                                                                               | 42.6        |
| Bohol, Philippines; mixed rural-urban; Jul 2000 - Dec 2004 (Lucero and colleagues) <sup>†</sup> | Defined population base (n=6094)  | Child with cough or difficult breathing and central cyanosis or inability to drink                                                                                                                                                                                                                                                                                                                                                                                                                                                                                                                | 10.3                                                                                  | (3.7)       |
| Suva, Fiji; urban; Jan 2001 - Dec 2002 <sup>50†</sup>                                           | Census-derived estimate (n=20954) | Presence of one or more of the following: cyanosis, SpO <sub>2</sub> <90%, altered consciousness, admission to ICU, ventilation, seizures (i) Cough or difficulty breathing and any pneumonia danger sign (central cyanosis, severe respiratory distress, tachypnea, chest indrawing in children <2 months, inability to feed or drink, vomiting everything, convulsions, prostration/lethargy) and chest X-ray not performed or negative; (ii) Central cyanosis or severe respiratory distress or tachypnea / chest indrawing in a child aged <2months and chest X-ray not performed or negative | (12.5)                                                                                | 4.5         |
| NhaTrang district, Vietnam; mixed rural-urban; Apr 2005 - Aug 2006 <sup>7</sup>                 | Census-derived estimate (n=24641) |                                                                                                                                                                                                                                                                                                                                                                                                                                                                                                                                                                                                   | 8.5                                                                                   | 2           |

**Table A5: Incidence of hospitalised severe and very severe ALRI in neonates (aged 0-27 days) from published and unpublished studies by World Health Organization regions**

| Location; population characteristic; study period (reference)                                | Incidence of hospitalised ALRI*<br>(per 1000 neonates per year) <sup>†</sup> | Incidence of hospitalised very severe ALRI (per 1000 neonates per year) <sup>‡</sup> |
|----------------------------------------------------------------------------------------------|------------------------------------------------------------------------------|--------------------------------------------------------------------------------------|
|                                                                                              | 0-27 days                                                                    | 0-27 days                                                                            |
| <b>Africa</b>                                                                                |                                                                              |                                                                                      |
| Kassena-Nankana District, Ghana; rural; Jun 1990- Aug 1991 (Morris and colleagues)           | 161.3                                                                        | NA <sup>‡</sup>                                                                      |
| Kilifi District, Kenya; rural; Apr 2002 - Dec 2008 (Moisi and colleagues) <sup>§</sup>       | 217.8                                                                        | 86.2                                                                                 |
| Manhiça district, Mozambique; rural; Mar 2004 - Mar 2006 (Roca and colleagues)               | 58.7                                                                         | 37.6                                                                                 |
| Lwak, Kisumu, Kenya; rural; Jun 2008 - May 2009 (Breiman and colleagues)                     | 21.2                                                                         | 21.2                                                                                 |
| Lwak, Kisumu, Kenya; rural; Jun 2009 - May 2010 (Breiman and colleagues)                     | 121.1                                                                        | 121.1                                                                                |
| <b>Americas</b>                                                                              |                                                                              |                                                                                      |
| Paysandú and Salto, Uruguay; mixed rural-urban; Jun 2001 - May 2004 (Hortal and colleagues)  | 8.6                                                                          | 1.2                                                                                  |
| Yukon Kuskokwim Delta, Alaska, USA; rural; Jul 2001 - Jun 2007 (Singleton and colleagues)    | 200.7                                                                        | 20.1                                                                                 |
| San Lorenzo & Comitancillo, Guatemala; rural; Dec 2002 - Dec 2004 (Bruce and colleagues)     | 100.51                                                                       | 100.51                                                                               |
| Santa Rosa, Guatemala; mixed rural-urban; Nov 2007 - Dec 2008 (McCracken and colleagues)     | 20                                                                           | 20                                                                                   |
| Paysandú and Salto, Uruguay; mixed rural-urban; Jan 2009 - Dec 2009 (Hortal and colleagues)  | 51.7                                                                         | 11.1                                                                                 |
| Santa Rosa, Guatemala; mixed rural-urban; Jan 2009 - Nov 2010 (McCracken and colleagues)     | 116                                                                          | 52.2                                                                                 |
| Quetzaltenango, Guatemala; mixed rural-urban; Feb 2009 - Nov 2010 (McCracken and colleagues) | 28.8                                                                         | 21.6                                                                                 |

\* ALRI= acute lower respiratory infection

<sup>†</sup> Data in parentheses are computed incidence estimates from data imputation

<sup>‡</sup> NA= Not available

<sup>§</sup> Day 0 excluded

| Location; population characteristic; study period (reference)                                      | Incidence of hospitalised ALRI*<br>(per 1000 neonates per year) <sup>†</sup> | Incidence of hospitalised very severe ALRI (per 1000 neonates per year) <sup>†</sup> |
|----------------------------------------------------------------------------------------------------|------------------------------------------------------------------------------|--------------------------------------------------------------------------------------|
|                                                                                                    | 0-27 days                                                                    | 0-27 days                                                                            |
| Yukon Kuskokwim Delta, Alaska, USA; rural; Jul 2009 - Jun 2010 (Singleton and colleagues)          | 119.1                                                                        | 0                                                                                    |
| <b>South-East Asia</b>                                                                             |                                                                              |                                                                                      |
| Lombok, Indonesia; rural; 1999 - 2002 (Gessner and colleagues)                                     | 51.3                                                                         | NA                                                                                   |
| Matlab, Bangladesh; rural; Jul 1999 - Jun 2001 <sup>6</sup>                                        | 28.3                                                                         | NA                                                                                   |
| Nakhon Phanom and Sa Kaeo provinces, Thailand; rural; Jan 2004 - Dec 2008 (Baggett and colleagues) | 58.1                                                                         | 24.8                                                                                 |
| Kamalapur, Bangladesh; urban; Jan 2008 - Dec 2008 (Brooks and colleagues)                          | 16.2                                                                         | 0                                                                                    |
| Multicentre, Bangladesh; rural; Jan 2008 - Dec 2008 (Azziz-Baumgartner and colleagues)             | 264.2                                                                        | 0                                                                                    |
| Kamalapur, Bangladesh; urban; Jan 2009 - Dec 2010 (Brooks and colleagues)                          | 30.6                                                                         | 10.2                                                                                 |
| Nakhon Phanom and Sa Kaeo provinces, Thailand; rural; Jan 2009 - Dec 2009 (Baggett and colleagues) | 69.3                                                                         | 20.8                                                                                 |
| Ballabgarh, Haryana, India; rural; Aug 2009 - Jul 2010 (Krishnan and colleagues)                   | 69.4                                                                         | NA                                                                                   |
| Multicentre, Bangladesh; rural; Jan 2009 - Dec 2009 (Azziz-Baumgartner and colleagues)             | 73.4                                                                         | 18.4                                                                                 |
| <b>Western Pacific</b>                                                                             |                                                                              |                                                                                      |
| Fujian, China; mixed rural-urban; Oct 1994 - Sep 1995 <sup>16</sup>                                | 134.6                                                                        | 44.9                                                                                 |
| Western Australia, Australia; mixed rural-urban; 1996-2005 <sup>24</sup>                           | 41.5                                                                         | NA                                                                                   |
| NhaTrang district, Vietnam; mixed rural-urban; Apr 2005 - Aug 2006 <sup>7</sup>                    | 137.3                                                                        | NA                                                                                   |

**Table A6: Comparative Incidence of severe and very severe ALRI from studies reporting data using community-based active case ascertainment as well as hospital-based passive case ascertainment**

| Study                                                                                                 | Incidence <sup>*</sup> of WHO severe pneumonia <sup>†</sup> in the community (active case ascertainment) | Incidence of hospitalised severe ALRI in the community (passive case ascertainment) | Incidence of WHO very severe disease <sup>‡</sup> in the community (active case ascertainment) | Incidence of hospitalised very severe ALRI (passive case ascertainment) |
|-------------------------------------------------------------------------------------------------------|----------------------------------------------------------------------------------------------------------|-------------------------------------------------------------------------------------|------------------------------------------------------------------------------------------------|-------------------------------------------------------------------------|
| Lwak, Kisumu, Kenya; rural; Jun 2008 - May 2009 (Breiman and colleagues)                              | 140.8                                                                                                    | 98.9                                                                                | 32.3                                                                                           | 21.3                                                                    |
| Lwak, Kisumu, Kenya; rural; Jun 2008 - May 2009 (Breiman and colleagues)                              | 129.2                                                                                                    | 86                                                                                  | 51.1                                                                                           | 31.6                                                                    |
| San Lorenzo & Comitancillo, Guatemala; rural; Dec 2002 - Dec 2004 (Bruce and colleagues) <sup>§</sup> | (55.3) <sup>**</sup>                                                                                     | (18.4)                                                                              | (52.4)                                                                                         | (18.4)                                                                  |
| Mirzapur, Bangladesh; rural; Oct 2004 - Sept 2008 (Arifeen and colleagues)                            | 108.3                                                                                                    | 19                                                                                  | 20.3                                                                                           | 5.7                                                                     |
| Kamalapur, Bangladesh; urban; Jan 2008 - Dec 2008 (Brooks and colleagues)                             | 47.7                                                                                                     | 24                                                                                  | 5.5                                                                                            | 4.8                                                                     |
| Kamalapur, Bangladesh; urban; Jan 2009 - Dec 2010 (Brooks and colleagues)                             | 43.7                                                                                                     | 21                                                                                  | 3.8                                                                                            | 3.2                                                                     |

\* Incidence rates are per 1000 children per year

<sup>†</sup> WHO severe pneumonia= Children aged 2-59 months- cough or difficulty in breathing with lower chest wall indrawing; Children aged <2months- increased respiratory rate (>60 breaths/ minute) OR lower chest wall indrawing

<sup>‡</sup> WHO very severe disease= Cough or difficulty breathing with at least one danger sign (cyanosis, difficulty in breastfeeding or drinking, vomiting everything, convulsions, lethargy, or unconsciousness, head nodding)

<sup>§</sup> Passive facilitated referral

<sup>\*\*</sup> Data in parentheses are imputed estimates

**Table A7: Details of the 37 studies reporting in-hospital case fatality ratios in children (0-59 months) hospitalised for severe ALRI**

| Location (reference)                                                               | Study Period              | CFR (%) |
|------------------------------------------------------------------------------------|---------------------------|---------|
| <b>Africa</b>                                                                      |                           |         |
| Kassena-Nankana District, Ghana (Morris and colleagues)                            | Jun 1990 - Aug 1991       | 3.3     |
| Soweto, South Africa (Madhi and colleagues)                                        | Mar 1998 - Oct 2005       | 6.2     |
| Bondo district, Kenya <sup>10</sup>                                                | Jan 2001 - Dec 2003       | 11.0    |
| Kilifi District, Kenya (Moisi and colleagues)                                      | Apr 2002 - Dec 2008       | 9.5     |
| Upper River Division and Central River Division, The Gambia (Zaman and colleagues) | Feb 2002-Apr 2004         | 12.0    |
| Manhiça district, Mozambique (Roca and colleagues)                                 | Mar 2004 - Mar 2006       | 8.7     |
| Bondo district, Kenya (Ope and colleagues)                                         | Jun 2007 - May 2009       | 4.3     |
| Lwak, Kisumu, Kenya (Breiman and colleagues)                                       | Jun 2008 - May 2009       | 1.5     |
| Kibera, Nairobi, Kenya (Breiman and colleagues)                                    | Jun 2008 - May 2009       | 1.4     |
| Upper River region, The Gambia (Mackenzie and colleagues)                          | 12 May 2008 - 11 May 2009 | 3.7     |
| Soweto, South Africa (Cohen and colleagues)                                        | Feb 2009- Jan 2010        | 0.8     |
| Lwak, Kisumu, Kenya (Breiman and colleagues)                                       | Jun 2009 - May 2010       | 1.0     |
| Kibera, Nairobi, Kenya (Breiman and colleagues)                                    | Jun 2009 - May 2010       | 0.6     |
| <b>Americas</b>                                                                    |                           |         |
| USA <sup>20</sup>                                                                  | 1997-2004                 | 0.2     |
| Paysandú and Salto, Uruguay (Hortal and colleagues)                                | Jan 2000 - Dec 2004       | 0.3     |
| Goiânia, Brazil (Andrade and colleagues)                                           | May 2000 - Aug 2001       | 1.1     |
| Colorado, USA (Simoes and colleagues)                                              | Jan 2000 - Dec 2008       | 0.6     |
| Concordia and Parana, Argentina (Ruvinsky and colleagues)                          | Nov 2002 - Oct 2005       | 1.1     |
| Pilar, Argentina (Gentile and colleagues)                                          | Jan 2003 - Dec 2005       | 0.2     |
| Goiânia, Brazil (Andrade and colleagues)                                           | May 17 2007 - May 16 2009 | 0.3     |
| Santa Rosa, Guatemala (McCracken and colleagues)                                   | Nov 2007 - Dec 2008       | 4.8     |
| Multicentre, El Salvador (Clara and colleagues)                                    | Jan 2007- Dec 2007        | 1.1     |
| Paysandú and Salto, Uruguay (Hortal and colleagues)                                | Jan 2009 - Dec 2009       | 5.1     |
| Colorado, USA (Simoes and colleagues)                                              | Jan 2009 - Dec 2009       | 0.8     |
| Santa Rosa, Guatemala (McCracken and colleagues)                                   | Jan 2009 - Nov 2010       | 5.0     |
| Quetzaltenango, Guatemala (McCracken and colleagues)                               | Feb 2009 - Nov 2010       | 3.5     |
| <b>Eastern Mediterranean</b>                                                       |                           |         |
| Sana'a, Yemen <sup>61</sup>                                                        | Jan1991-Dec 1995          | 8.7     |
| Karachi, Pakistan <sup>5</sup>                                                     | Feb 2007- May 2008        | 3.7     |
| <b>Europe</b>                                                                      |                           |         |
| Spain <sup>32</sup>                                                                | Jan 1995 - Dec 1996       | 0.4     |
| <b>South East Asia</b>                                                             |                           |         |
| Matlab, Bangladesh <sup>40</sup>                                                   | May 1988 - Apr 1989       | 7.4     |
| Lombok, Indonesia (Gessner and colleagues)                                         | 1999 - 2002               | 11.0    |

|                                                                        |                      |     |
|------------------------------------------------------------------------|----------------------|-----|
| Mirzapur, Bangladesh (Arifeen and colleagues)                          | Oct 2004 - Sept 2008 | 2.2 |
| Multihospital surveillance, Bangladesh (Naheed and colleagues)         | May 2004 - Apr 2008  | 8.0 |
| Patan, Nepal <sup>44</sup>                                             | Apr 2005 - Dec 2006  | 2.2 |
| Multicentre, India (Chandran and colleagues)                           | Jul 2005 - Mar 2007  | 0.3 |
| Nakhon Phanom and Sa Kaeo provinces, Thailand (Baggett and colleagues) | Jan 2006 - Dec 2008  | 0.8 |
| Bangalore, India <sup>45</sup>                                         | Jan 2006 - Dec 2006  | 5.8 |
| Kamalapur, Bangladesh (Brooks and colleagues)                          | Jan 2008 - Dec 2008  | 0.9 |
| Nakhon Phanom and Sa Kaeo provinces, Thailand (Baggett and colleagues) | Jan 2009 - Dec 2009  | 0.4 |
| Kamalapur, Bangladesh (Brooks and colleagues)                          | Jan 2009 - Dec 2009  | 0.7 |

#### Western Pacific

|                                            |                     |     |
|--------------------------------------------|---------------------|-----|
| Bohol, Philippines (Lucero and colleagues) | Jul 2000 - Dec 2004 | 1.6 |
| NhaTrang district, Vietnam <sup>7</sup>    | Apr 2005 - Aug 2006 | 2.6 |
| Suva, Fiji <sup>60</sup>                   | Jan 2001 - Dec 2002 | 2.8 |

**Table A8: Details of the 16 studies reporting in-hospital case fatality ratios in children (0-59 months) hospitalised for very severe ALRI**

| Location (reference)                                                                  | Study Period              | CFR (%) |
|---------------------------------------------------------------------------------------|---------------------------|---------|
| <b>Africa</b>                                                                         |                           |         |
| Soweto, South Africa (Madhi and colleagues)                                           | Mar 1998 - Oct 2005       | 8.7     |
| Kilifi District, Kenya (Moisi and colleagues)                                         | Apr 2002 - Dec 2008       | 19.0    |
| The Greater Banjul area and Upper River region, The Gambia (Mackenzie and colleagues) | 12 May 2008 - 11 May 2009 | 3.6     |
| Lwak, Kisumu, Kenya (Breiman and colleagues)                                          | Jun 2008 - May 2009       | 2.1     |
| Lwak, Kisumu, Kenya (Breiman and colleagues)                                          | Jun 2009 - May 2010       | 0.9     |
| <b>Americas</b>                                                                       |                           |         |
| Concordia and Parana, Argentina (Ruvinsky and colleagues)                             | Nov 2002 - Oct 2005       | 9.1     |
| Pilar, Argentina (Gentile and colleagues)                                             | Jan 2003 - Dec 2005       | 2.6     |
| Goiânia, Brazil (Andrade and colleagues)                                              | May 17 2007 - May 16 2009 | 6.7     |
| Colorado, USA (Simoes and colleagues)                                                 | Jan 2000 - Dec 2008       | 3.5     |
| Santa Rosa, Guatemala (McCracken and colleagues)                                      | Nov 2007 - Dec 2008       | 3.0     |
| Santa Rosa, Guatemala (McCracken and colleagues)                                      | Jan 2009 - Nov 2010       | 6.4     |
| Quetzaltenango, Guatemala (McCracken and colleagues)                                  | Feb 2009 - Nov 2010       | 3.4     |
| Paysandú and Salto, Uruguay (Hortal and colleagues)                                   | Jan 2009 - Dec 2009       | 2.1     |
| Colorado, USA (Simoes and colleagues)                                                 | Jan 2009 - Dec 2009       | 4.4     |
| <b>South East Asia</b>                                                                |                           |         |
| Nakhon Phanom and Sa Kaeo provinces, Thailand (Baggett and colleagues)                | Jan 2006 - Dec 2008       | 13.4    |
| Multicentre, India (Chandran and colleagues)                                          | Jul 2005 - Mar 2007       | 0.4     |
| Mirzapur, Bangladesh (Arifeen and colleagues)                                         | Oct 2004 - Sept 2008      | 6.0     |
| Multihospital surveillance, Bangladesh (Naheed and colleagues)                        | May 2004 - Apr 2008       | 14.5    |
| Nakhon Phanom and Sa Kaeo provinces, Thailand (Baggett and colleagues)                | Jan 2009 - Dec 2009       | 6.3     |
| <b>Western Pacific</b>                                                                |                           |         |
| Bohol, Philippines (Lucero and colleagues)                                            | Jul 2000 - Dec 2004       | 8.8     |

## **VI. Additional Figures**

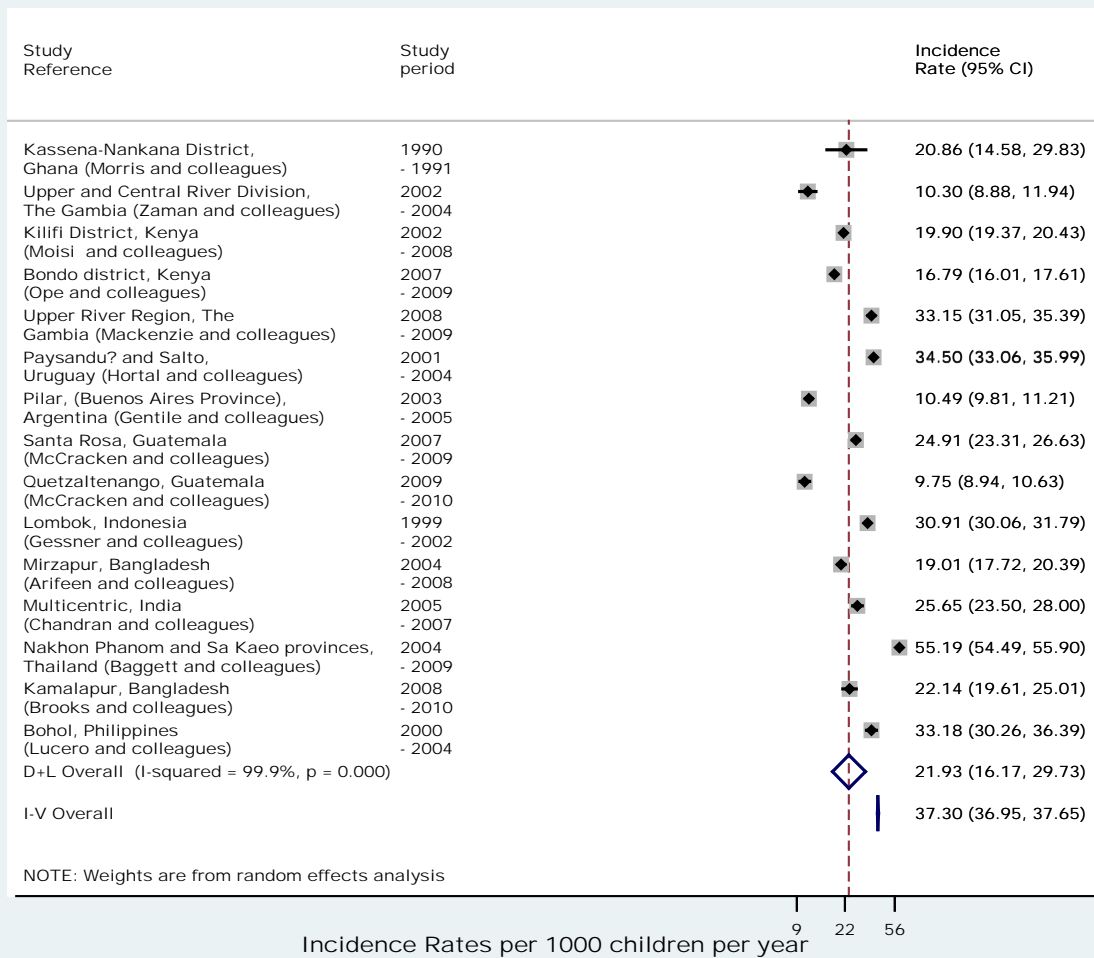

**Figure A1: Incidence of hospitalised severe ALRI (per 1000 children per year) in children aged 0-4 years with / without lower chest wall indrawing**

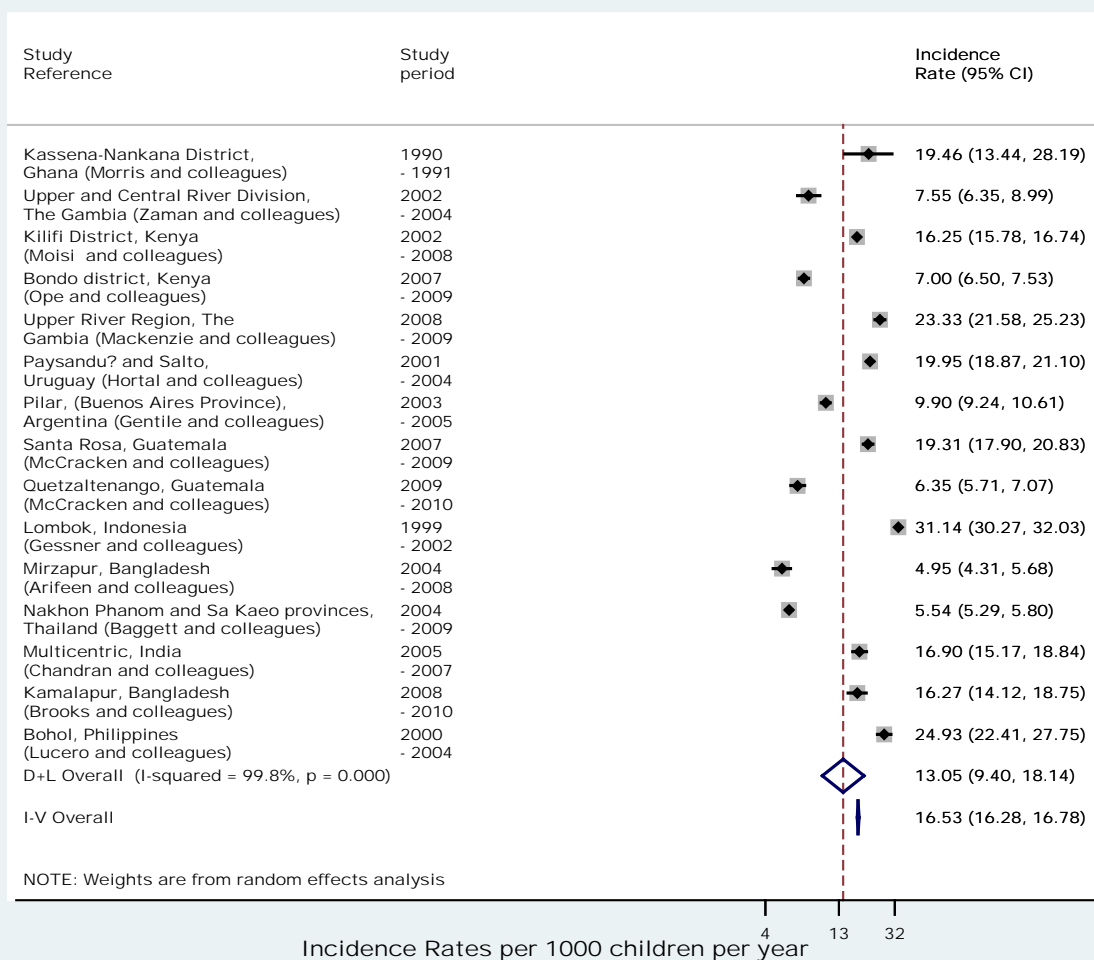

**Figure A2: Incidence of hospitalised severe ALRI (per 1000 children per year) in children aged 0-4 years with lower chest wall indrawing**

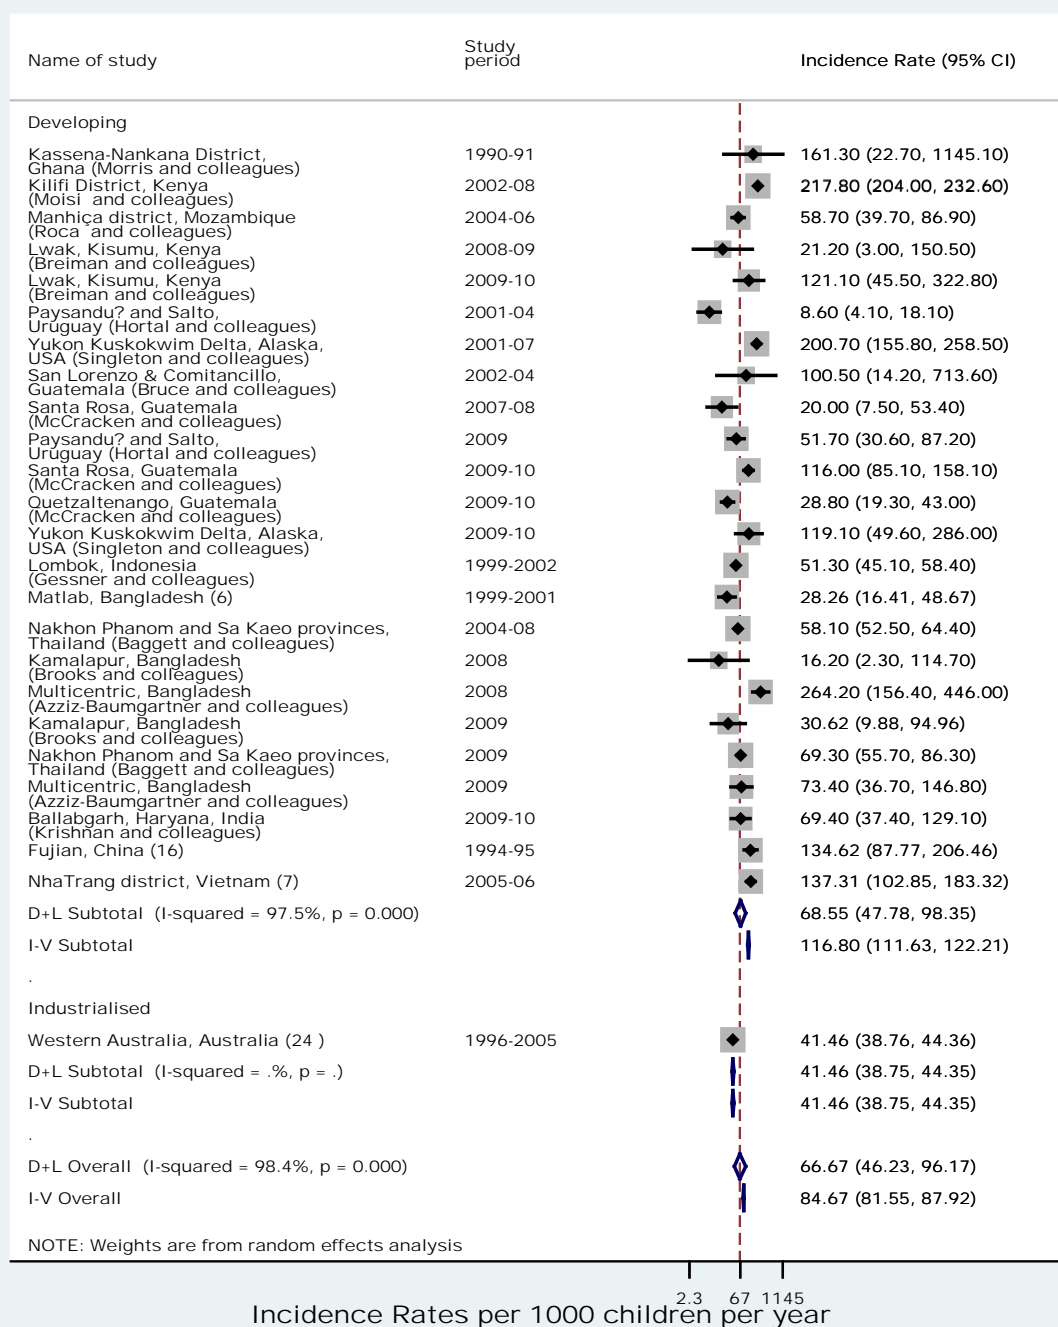

Figure A3: Incidence of hospitalised severe ALRI in children aged 0-27 days

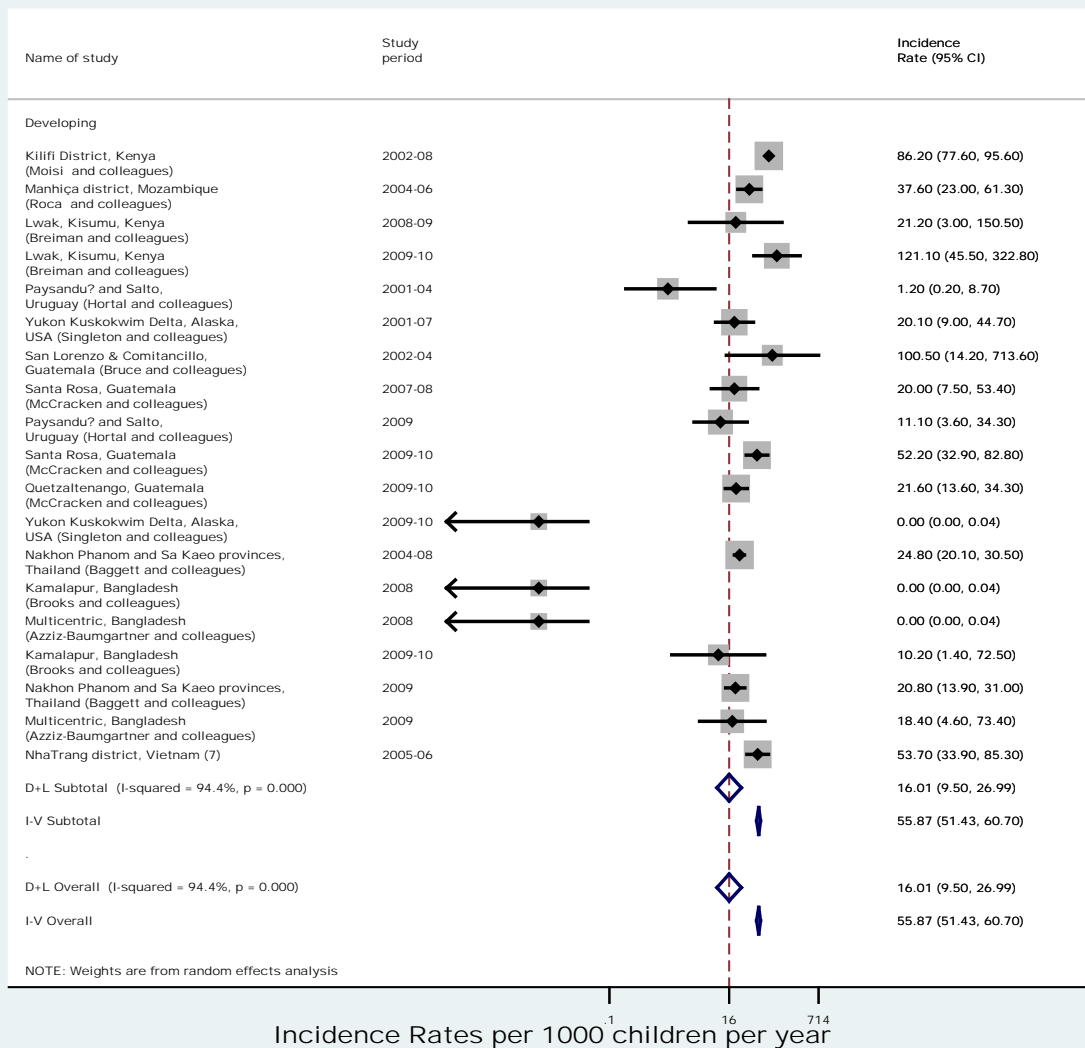

Figure A4: Incidence of hospitalised very severe ALRI in children aged 0-27 days

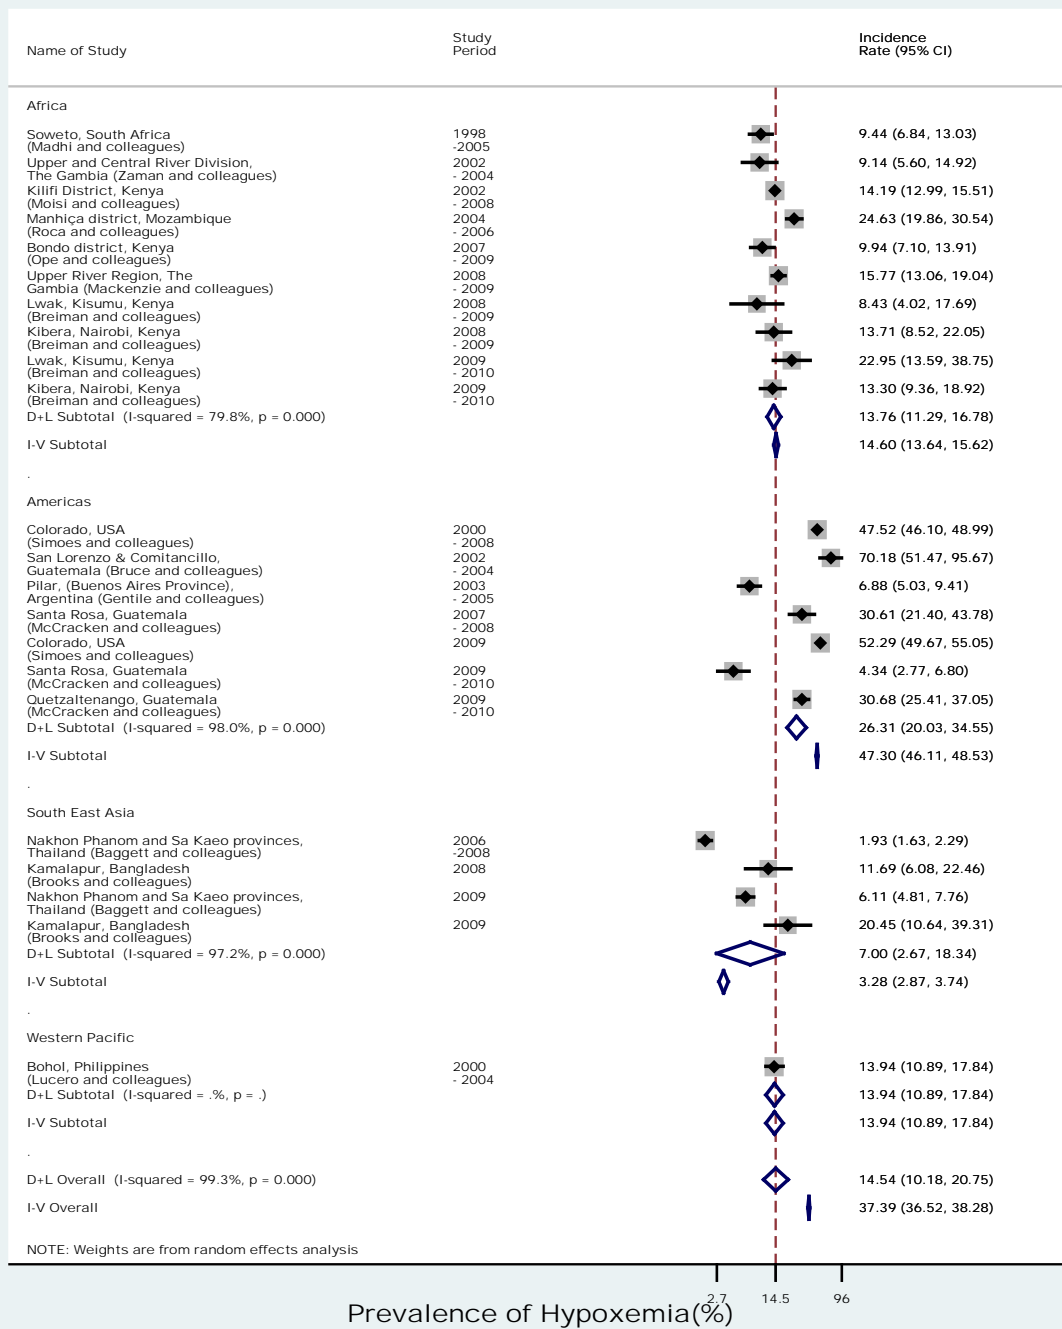

Figure A5: Prevalence of hypoxemia in children aged 0-11 months hospitalised for severe ALRI (n=22 studies)

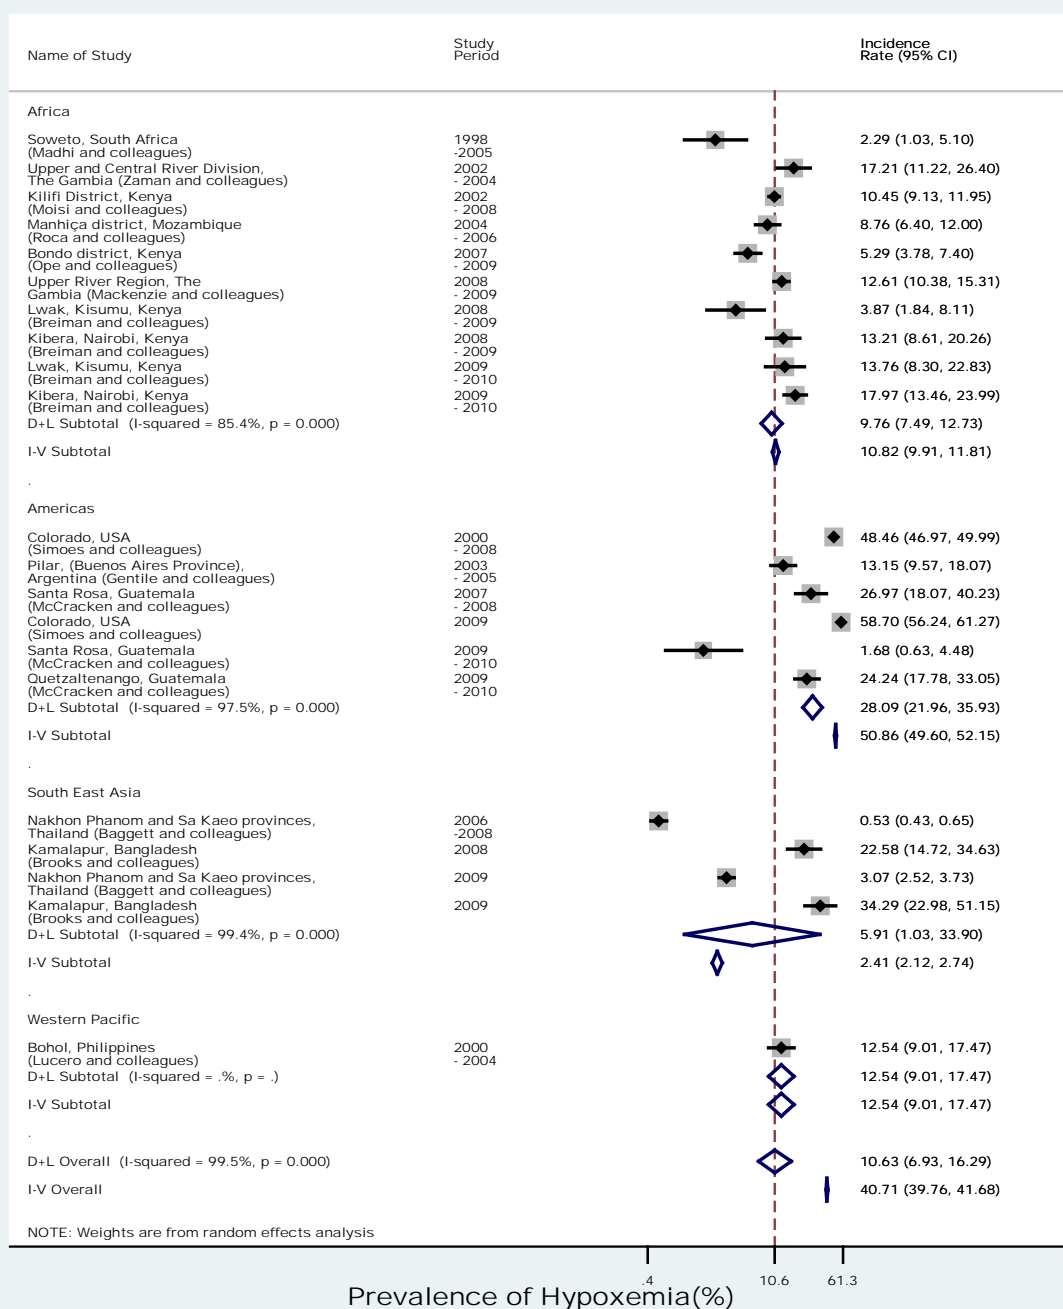

Figure A6: Prevalence of hypoxemia in children aged 12-59 months hospitalised for severe ALRI (n=21 studies)

Figure A7: Relationship between incidence of hospitalised severe ALRI and in-hospital CFR in Africa

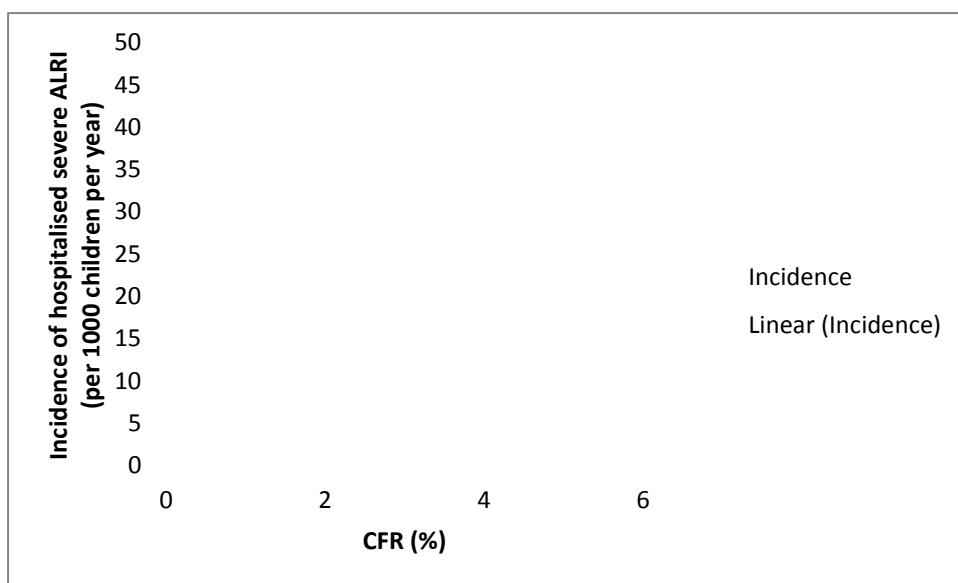

Figure A8: Relationship between incidence of hospitalised severe ALRI and in-hospital CFR in Americas

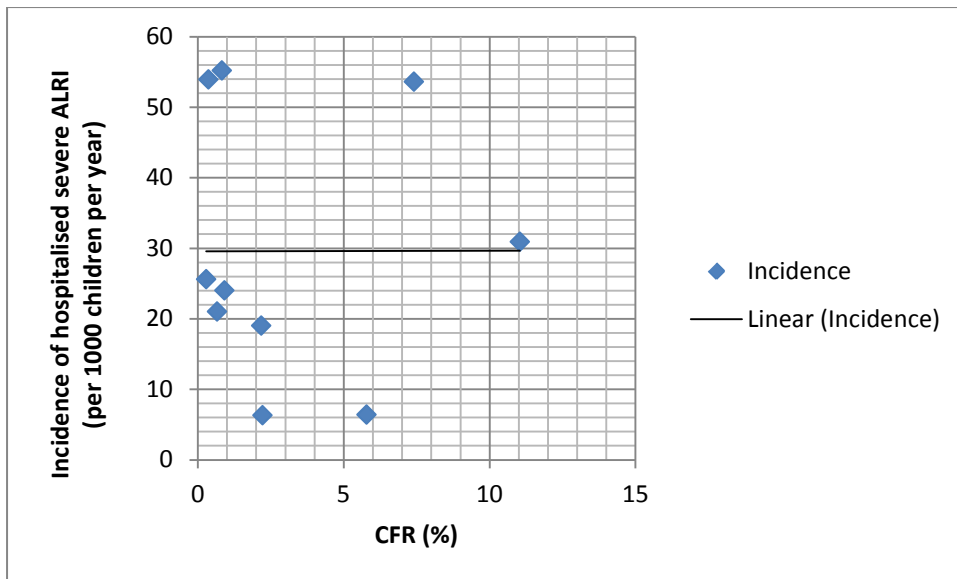

Figure A9: Relationship between incidence of hospitalised severe ALRI and in-hospital CFR in South-East Asia

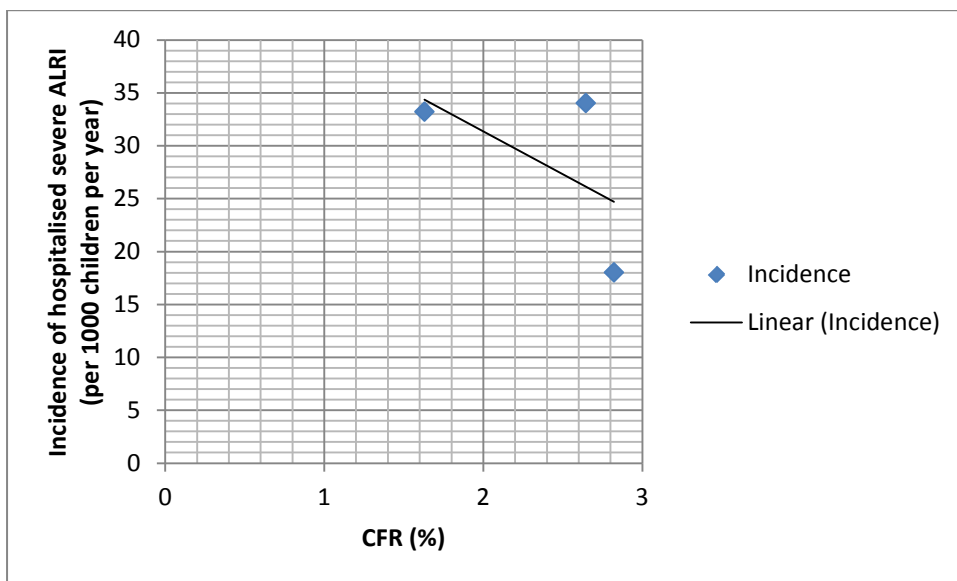

Figure A10: Relationship between incidence of hospitalised severe ALRI and in-hospital CFR in Western Pacific Region

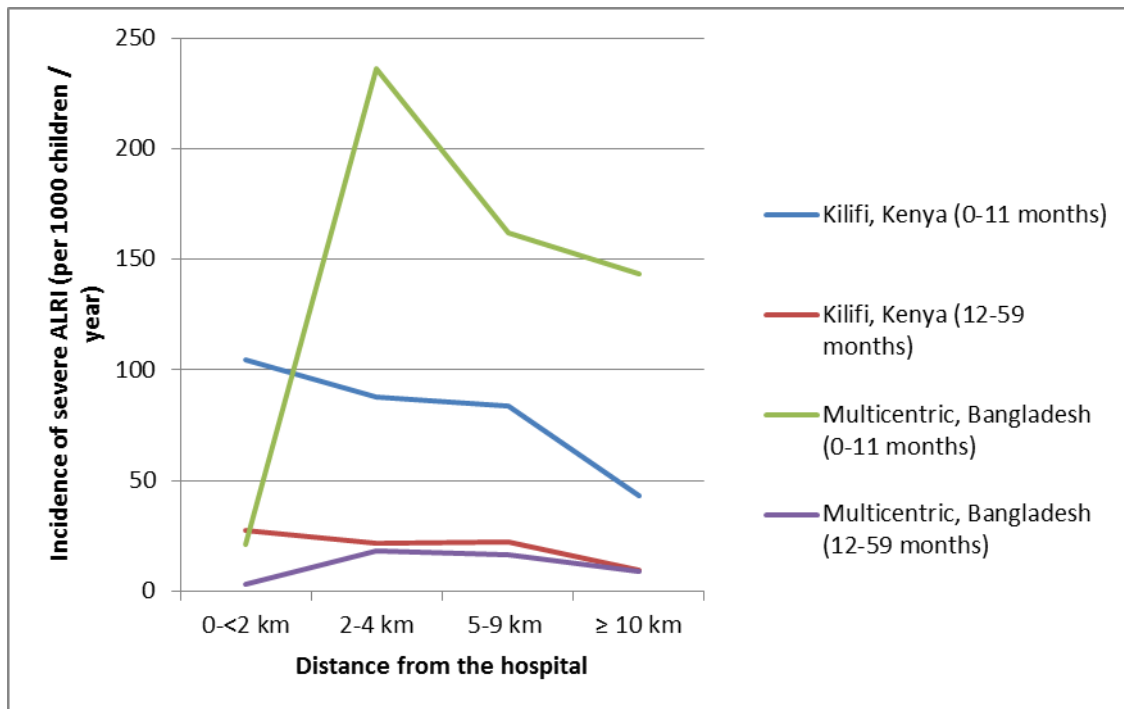

Figure A11: Variation in incidence (per 1000 children per year) of hospitalised severe ALRI by distance from hospital in children aged below 5 years

## References

1. Campbell JD, Sow SO, Levine MM, Kotloff KL. The causes of hospital admission and death among children in Bamako, Mali. *J Trop Pediatr*. 2004; **50**(3): 158-63.
2. Peck AJ, Holman RC, Curns AT, Lingappa JR, Cheek JE, Singleton RJ, et al. Lower respiratory tract infections among American Indian and Alaska Native children and the general population of U.S. Children. *Pediatr Infect Dis J*. 2005; **24**(4): 342-51.
3. Lowther SA, Shay DK, Holman RC, Clarke MJ, Kaufman SF, Anderson LJ. Bronchiolitis-associated hospitalizations among American Indian and Alaska Native children. *Pediatr Infect Dis J*. 2000; **19**(1): 11-7.
4. Nizami SQ, Bhutta ZA, Hasan R. Incidence of acute respiratory infections in children 2 months to 5 years of age in periurban communities in Karachi, Pakistan. *JPMMA J Pak Med Assoc*. 2006; **56**(4): 163-7.
5. Owais A, Tikmani SS, Sultana S, Zaman U, Ahmed I, Allana S, et al. Incidence of pneumonia, bacteremia, and invasive pneumococcal disease in Pakistani children. *Trop Med Int Health*. 2010.
6. Baqui AH, Rahman M, Zaman K, El Arifeen S, Chowdhury HR, Begum N, et al. A population-based study of hospital admission incidence rate and bacterial aetiology of acute lower respiratory infections in children aged less than five years in Bangladesh. *Journal of Health, Population & Nutrition*. 2007; **25**(2): 179-88.
7. Anh DD, Kilgore PE, Slack MP, Nyambat B, Tho le H, Yoshida LM, et al. Surveillance of pneumococcal-associated disease among hospitalized children in Khanh Hoa Province, Vietnam. *Clin Infect Dis*. 2009; **48** Suppl 2: S57-64.
8. Yoshida LM, Suzuki M, Yamamoto T, Nguyen HA, Nguyen CD, Nguyen AT, et al. Viral pathogens associated with acute respiratory infections in central vietnamese children. *Pediatric Infectious Disease Journal*. 2010; **29**(1): 75-7.
9. Robertson SE, Roca A, Alonso P, Simoes EAF, Kartasasmita CB, Olaleye DO, et al. Respiratory syncytial virus infection: denominator-based studies in Indonesia, Mozambique, Nigeria and South Africa. *Bull World Health Organ*. 2004; **82**(12): 914-22.
10. Tornheim JA, Many AS, Oyando N, Kabaka S, Breiman RF, Feikin DR. The epidemiology of hospitalized pneumonia in rural Kenya: the potential of surveillance data in setting public health priorities. *Int J Infect Dis*. 2007; **11**(6): 536-43.
11. Williams P, Gracey M, Smith P. Hospitalization of aboriginal and non-aboriginal patients for respiratory tract diseases in Western Australia, 1988-1993. *Int J Epidemiol*. 1997; **26**(4): 797-805.
12. Khan AJ, Hussain H, Omer SB, Chaudry S, Sajid A, Adil K, et al. High incidence of childhood pneumonia at high altitudes in Pakistan: a longitudinal cohort study. *Bull World Health Organ*. 2009; **87**(3): 193-9.
13. Sun YF, Fang XQ, He HX, Zhu QZ, Wang Q, Chen HY. Analysis of acute respiratory infections surveillance in children aged 0-4 years old (0-4岁儿童急性呼吸道感染监测结果分析). *Chinese Maternal and Child Health (中国妇幼保健)*. 1992; **7**(5).
14. Xie SM, Chen L, Hou YJ, Zhen SY, Yu Q. Analysis of acute respiratory infections surveillance in 3097 children aged 0-4 years old (0-4岁小儿急性呼吸道感染监测3097例分析). *Chongqing Medical Journal 重庆医学*. 1993; **22**(6).
15. Chen P. Effect of acute respiratory infections management to reduce mortality in children with pneumonia (运用ARI管理适宜技术降低婴幼儿肺炎死亡率). *Jiangsu Journal of Preventive Medicine (江苏预防医学)*. 1996; **2**.
16. Huang WH, Chen LN, Shi LB. Analysis of acute respiratory infections surveillance in children aged 0-4 years old in Licheng (鲤城区0-4岁儿童急性呼吸道感染监测结果分析). *Strait Journal of Preventive Medicine (海峡预防医学杂志)*. 1999; **5**(2).

17. Chen W, Zhao MR, Zhao YY, Ma BJ. Analysis of acute respiratory infections surveillance in children in rural Henan (河南农村婴幼儿急性呼吸道感染监测结果分析). *Chinese Journal of Rural Medicine (中国农村医学)*. 1997; **25**(4).
18. Weigl JA, Puppe W, Belke O, Neus J, Bagci F, Schmitt HJ. Population-based incidence of severe pneumonia in children in Kiel, Germany. *Klin Padiatr*. 2005; **217**(4): 211-9.
19. Weinberg GA, Hall CB, Iwane MK, Poehling KA, Edwards KM, Griffin MR, et al. Parainfluenza virus infection of young children: estimates of the population-based burden of hospitalization. *J Pediatr*. 2009; **154**(5): 694-9.
20. Grijalva CG, Nuorti JP, Zhu Y, Griffin MR. Increasing incidence of empyema complicating childhood community-acquired pneumonia in the United States. *Clin Infect Dis*. 2010; **50**(6): 805-13.
21. Lee GE, Lorch SA, Sheffler-Collins S, Kronman MP, Shah SS. National hospitalization trends for pediatric pneumonia and associated complications. *Pediatrics*. 2010; **126**(2): 204-13.
22. Cilla G, Onate E, Perez-Yarza EG, Montes M, Vicente D, Perez-Trallero E. Hospitalization rates for human metapneumovirus infection among 0- to 3-year-olds in Gipuzkoa (Basque Country), Spain. *Epidemiol Infect*. 2009; **137**(1): 66-72.
23. Forster J, Ihorst G, Rieger CHL, Stephan V, Frank H-D, Gurth H, et al. Prospective population-based study of viral lower respiratory tract infections in children under 3 years of age (the PRI.DE study). *Eur J Pediatr*. 2004; **163**(12): 709-16.
24. Moore HC, de Klerk N, Richmond P, Lehmann D. A retrospective population-based cohort study identifying target areas for prevention of acute lower respiratory infections in children. *BMC Public Health*. 2010; **10**: 757.
25. Mulholland K, Hilton S, Adegbola R, Usen S, Oparaugo A, Omosigho C, et al. Randomised trial of Haemophilus influenzae type-b tetanus protein conjugate vaccine [corrected] for prevention of pneumonia and meningitis in Gambian infants.[Erratum appears in Lancet 1997 Aug 16;350(9076):524]. *Lancet*. 1997; **349**(9060): 1191-7.
26. Madhi SA, Kuwanda L, Cutland C, Klugman KP. The impact of a 9-valent pneumococcal conjugate vaccine on the public health burden of pneumonia in HIV-infected and -uninfected children. *Clin Infect Dis*. 2005; **40**(10): 1511-8.
27. Carroll KN, Gebretsadik T, Griffin MR, Wu P, Dupont WD, Mitchel EF, et al. Increasing burden and risk factors for bronchiolitis-related medical visits in infants enrolled in a state health care insurance plan. *Pediatrics*. 2008; **122**(1): 58-64.
28. Henrickson KJ, Hoover S, Kehl KS, Hua W, Henrickson KJ, Hoover S, et al. National disease burden of respiratory viruses detected in children by polymerase chain reaction. *Pediatric Infectious Disease Journal*. 2004; **23**(1 Suppl): S11-8.
29. Yorita KL, Holman RC, Sejvar JJ, Steiner CA, Schonberger LB. Infectious disease hospitalizations among infants in the United States. *Pediatrics*. 2008; **121**(2): 244-52.
30. Roxburgh CSD, Youngson GG, Townend JA, Turner SW. Trends in pneumonia and empyema in Scottish children in the past 25 years. *Arch Dis Child*. 2008; **93**(4): 316-8.
31. Jokinen C, Heiskanen L, Juvonen H, Kallinen S, Karkola K, Korppi M, et al. Incidence of community-acquired pneumonia in the population of four municipalities in eastern Finland. *Am J Epidemiol*. 1993; **137**(9): 977-88.
32. Monge V, Gonzalez A. Hospital admissions for pneumonia in Spain. *Infection*. 2001; **29**(1): 3-6.
33. Gil A, San-Martin M, Carrasco P, Gonzalez A. Epidemiology of pneumonia hospitalizations in Spain, 1995-1998. *J Infect*. 2002; **44**(2): 84-7.
34. Garcés-Sánchez MD, Díez-Domingo J, Ballester Sanz A, Peidro Boronat C, García López M, Anton Crespo V, et al. Epidemiology of community-acquired pneumonia in children aged less than 5 years old in the Autonomous Community of Valencia (Spain). *An Pediatr (Barc)*. 2005; **63**(2): 125-30.
35. Comes Castellano AM, Lluch Rodrigo JA, Portero Alonso A, Pastor Villalba E, Sanz Valero M. Development of the incidence of pneumonia in the autonomous community of Valencia throughout the 1995-2001 period. A retrospective study. *An Med Interna*. 2005; **22**(3): 118-23.

36. Vicente D, Montes M, Cilla G, Perez-Yarza EG, Perez-Trallero E. Hospitalization for respiratory syncytial virus in the paediatric population in Spain. *Epidemiol Infect.* 2003; **131**(2): 867-72.
37. van Gageldonk-Lafeber AB, Bogaerts MAH, Verheij RA, van der Sande MAB. Time trends in primary-care morbidity, hospitalization and mortality due to pneumonia. *Epidemiol Infect.* 2009; **137**(10): 1472-8.
38. Ansaldi F, Sticchi L, Durando P, Carloni R, Oreste P, Vercelli M, et al. Decline in pneumonia and acute otitis media after the introduction of childhood pneumococcal vaccination in Liguria, Italy.[Erratum appears in *J Int Med Res.* 2009 Mar-Apr;37(2):594]. *J Int Med Res.* 2008; **36**(6): 1255-60.
39. Che D, Caillere N, Brosset P, Vallejo C, Josseran L. Burden of infant bronchiolitis: data from a hospital network. *Epidemiol Infect.* 2010; **138**(4): 573-5.
40. Zaman K, Baqui AH, Yunus M, Sack RB, Bateman OM, Chowdhury HR, et al. Acute respiratory infections in children: a community-based longitudinal study in rural Bangladesh. *J Trop Pediatr.* 1997; **43**(3): 133-7.
41. Brooks WA, Santosham M, Naheed A, Goswami D, Wahed MA, Diener-West M, et al. Effect of weekly zinc supplements on incidence of pneumonia and diarrhoea in children younger than 2 years in an urban, low-income population in Bangladesh: randomised controlled trial. *Lancet.* 2005; **366**(9490): 999-1004.
42. Chandyo RK, Shrestha PS, Valentiner-Branth P, Mathisen M, Basnet S, Ulak M, et al. Two weeks of zinc administration to Nepalese children with pneumonia does not reduce the incidence of pneumonia or diarrhea during the next six months. *J Nutr.* 2010; **140**(9): 1677-82.
43. Shah AS, Knoll MD, Sharma PR, Moisi JC, Kulkarni P, Lalitha MK, et al. Invasive pneumococcal disease in Kanti Children's Hospital, Nepal, as observed by the South Asian Pneumococcal Alliance network. *Clin Infect Dis.* 2009; **48 Suppl 2**: S123-8.
44. Williams EJ, Thorson S, Maskey M, Mahat S, Hamaluba M, Dongol S, et al. Hospital-based surveillance of invasive pneumococcal disease among young children in urban Nepal. *Clin Infect Dis.* 2009; **48 Suppl 2**: S114-22.
45. Shah AS, Nisarga R, Ravi Kumar KL, Hubler R, Herrera G, Kilgore PE. Establishment of population-based surveillance for invasive pneumococcal disease in Bangalore, India. *Indian J Med Sci.* 2009; **63**(11): 498-507.
46. Tupasi TE, de Leon LE, Lupisan S, Torres CU, Leonor ZA, Sunico ES, et al. Patterns of acute respiratory tract infection in children: a longitudinal study in a depressed community in Metro Manila. *Rev Infect Dis.* 1990; **12 Suppl 8**: S940-9.
47. Hu YC, Lu WY. Effect of acute respiratory infections management in children (小儿急性呼吸道感染管理效果分析). *Shanghai Journal of Preventive Medicine (上海预防医学杂志)* 1996; **8**(2).
48. Wang L, Dong SP, Zhao GZ, Li JS. Promoting standard case management of acute respiratory infections to reduce mortality in children aged 0-4 years old (推广儿童急性呼吸道感染标准病例管理降低0-4岁儿童死亡率). *Chinese Journal of Primary Health Care (中国初级卫生保健)*. 1997; **11**(3).
49. Liu Q, Fu P, Zhao S, Zou SH. Analysis of acute respiratory infections surveillance in children aged 0-4 years old in Qingdao (青岛市0-4岁儿童急性呼吸道感染监测结果分析). *Acta Academiae Medicinae Qingdao (青岛医学院学报)*. 1994; **30**(3).
50. Lou LY, Cong GQ, Sun SX, Song YH, Li GL, Yang S. Analysis of acute respiratory infections surveillance in children under 5 years in rural Heilongjiang (黑龙江省农村5岁以下儿童急性呼吸道感染监测分析). *Chinese Journal of Primary Health Care (中国初级卫生保健)*. 1995; **9**(2).
51. Grant CC, Scragg R, Tan D, Pati A, Aickin R, Yee RL. Hospitalization for pneumonia in children in Auckland, New Zealand. *J Paediatr Child Health.* 1998; **34**(4): 355-9.

52. Chi XX, Chen X, Ouyang Y, Xue XL. Preliminary analysis of acute respiratory infections surveillance in children under 5 years in Fujian (福建省ARI项目县5岁以下儿童监测结果初步分析). Strait Journal of Preventive Medicine (海峡预防医学杂志). 1996; **2**(3).
53. Mo JZ. Analysis of acute respiratory infections surveillance in 20867 children aged 0-4 years old in Southern Jiangsu (苏南农村20867名0-4岁儿童ARI监测研究). Chinese Journal of Primary Health Care (中国初级卫生保健). 1998; **12**(4).
54. Xu GL, Zheng JY, Li LX, Wei YH, Cai ZL. Analysis of acute respiratory infections monitoring in children under 5 years in Huaning, Yunnan (云南省华宁县5岁以下儿童急性呼吸道感染监测分析). Maternal and Child Health (妇幼保健). 2000; **14**(6).
55. Gao JY, Feng B, Li L. Establishing respiratory monitoring network to reduce pneumonia mortality in children (建立儿童呼吸监测网控制肺炎降低肺炎死亡率的研究). Chinese Journal of Maternal and Child Health (中国妇幼保健). 2004; **19**(8).
56. Qu JS, Li L, Wang GY. The influence of acute respiratory infection administration on mortality of pneumonia in children under five years old (急性呼吸道感染管理对5岁以下儿童肺炎死亡率的影响). Qilu Journal of Medicine (齐鲁医学杂志). 2009; **24**(1).
57. Wu P, Chang I, Tsai F, Hsieh Y, Shao P, Chang L, et al. Epidemiology and impacts of children hospitalized with pneumonia from 1997 to 2004 in Taiwan. Pediatric Pulmonology. 2009; **44**(2): 162-6.
58. Russell FM, Fakakovi T, Paasi S, Ika A, Mulholland EK. Reduction of meningitis and impact on under-5 pneumonia after introducing the Hib vaccine in the Kingdom of Tonga. Ann Trop Paediatr. 2009; **29**(2): 111-7.
59. Ho P-L, Chiu SS, Chow FKH, Mak GC, Lau YL. Pediatric hospitalization for pneumococcal diseases preventable by 7-valent pneumococcal conjugate vaccine in Hong Kong. Vaccine. 2007; **25**(39-40): 6837-41.
60. Magree HC, Russell FM, Sa'aga R, Greenwood P, Tikoduadua L, Pryor J, et al. Chest X-ray-confirmed pneumonia in children in Fiji. Bull World Health Organ. 2005; **83**(6): 427-33.
61. Banajeh SM. Outcome for children under 5 years hospitalized with severe acute lower respiratory tract infections in Yemen: a 5 year experience. Journal of Tropical Pediatrics. 1998; **44**(6): 343-6.
